# Supplementary material for: Nickel-Imidazolium Low Transition Temperature Mixtures with Lewis-Acidic Character
Source: MDPI journal article supplement (doi:10.3390/molecules28176338), 2023-08-30
Supplement: s1 [file s1]

Article

# Nickel-imidazolium low transition temperature mixtures with Lewis-acidic character

Mario Martos <sup>1</sup>, and Isidro M. Pastor <sup>1,\*</sup>

<sup>1</sup> Organic Chemistry Department and Institute of Organic Synthesis (ISO), University of Alicante, ctra. San Vicente del Raspeig s/n, 03690, San Vicente del Raspeig, Alicante, Spain

\* Correspondence: ipastor@ua.es; Tel.: (+34)965903728

## Supplementary Information

### Contents

|                                               |    |
|-----------------------------------------------|----|
| Sustainability metrics.....                   | 2  |
| Differential Scanning Calorimetry traces..... | 9  |
| XPS analyses .....                            | 12 |
| NMR spectra .....                             | 14 |
| Miscellaneous images .....                    | 26 |

## Sustainability metrics

### Equations and general considerations

The sustainability metrics used (E-factor, yield, stoichiometric factor, atom economy, Andraos' reaction mass efficiency, materials recovery parameter) were calculated with equations 1-6:

$$E\text{-factor} = \frac{\sum \text{Mass of components} - \text{Mass of product}}{\text{Mass of product}} \quad (S1)$$

$$Y = \frac{\text{Mass of product obtained}}{\text{Theoretical mass of product}} \cdot 100 \quad (S2)$$

$$AE = \frac{MW_{\text{Prod}}}{\sum (S_{\text{Reactants}} \cdot MW_{\text{Reactants}})} \cdot 100 \quad (S3)$$

$$SF = \frac{\text{Mass of product}}{\text{Mass of stoichiometric reagents}} \cdot 100 \quad (S4)$$

$$RME_{\text{Andraos}} = \frac{\text{Mass of product}}{\sum \text{Mass of components} - \sum \text{Mass recovered}} \cdot 100 \quad (S5)$$

$$MRP = \frac{1}{(1 + (\frac{\text{Mass of product}}{\sum \text{Mass of reagents}} \cdot 100) \cdot E_{\text{Aux}})} \cdot 100 \quad (S6)$$

The Y, AE, SF,  $RME_{\text{Andraos}}$  and MRP values were combined into a vector magnitude ratio (VMR) using equation 7:

$$VMR = \frac{1}{\sqrt{5}} \sqrt{(Y)^2 + (AE)^2 + (RME)^2 + \left(\frac{1}{SF}\right)^2 + (MRP)^2} \quad (S7)$$

The EcoScale score was obtained using the tool developed by the authors, available at <http://ecoscale.cheminfo.org/calculator> (last accessed July 24th 2023)

Some additional considerations and standard values applied to the calculations are compiled in Table S1.

**Table S1.** Standard values for the calculation of sustainability metrics on protocols with missing data.

| Parameter                                       | Value                                                                     |
|-------------------------------------------------|---------------------------------------------------------------------------|
| Solvent recovery (reaction, work-up)            | 80% of the initial mass if not requiring fractional distillation          |
| Water and saturated sodium chloride for work-up | Equal volume to the first fraction of organic solvent used                |
| Work-up reported but not specified              | 3x10 mL/mmol of ethyl acetate and 10 mL/mmol of saturated sodium chloride |
| Drying agents                                   | 1/5 <sup>th</sup> of the total mass of organic solvent                    |

## Full metrics of the comparison of Table 2

**Table S2.** Sustainability metrics for the synthesis of 1. Entries correlate with those of Table 2.

| Entry | Yield | 1/SF  | AE    | RME   | MRP   | E-factor | EcoScale |
|-------|-------|-------|-------|-------|-------|----------|----------|
| 1     | 0.99  | 1     | 0.945 | 0.201 | 0.212 | 3.98     | 79       |
| 2     | 0.99  | 1     | 0.945 | 0.345 | 0.369 | 1.90     | 89       |
| 3     | 0.88  | 0.735 | 0.945 | 0.054 | 0.087 | 17.59    | 70       |
| 4     | 0.96  | 0.847 | 0.945 | 0.422 | 0.549 | 1.37     | 77       |
| 5     | 0.95  | 1     | 0.945 | 0.01  | 0.012 | 94.82    | 79       |
| 6     | 0.96  | 1     | 0.945 | 0.003 | 0.003 | 360.36   | 69       |

Purification by chromatography omitted for RME, MRP and E-factor in entries 3 to 6.

|                                 |              |                          |             |             |
|---------------------------------|--------------|--------------------------|-------------|-------------|
| Actual Mass of Reagents         | 0,0817 g     | Parameter                | Actual      | Ideal Limit |
| Stoichiometric Mass of Reagents | 0,08 g       | AE                       | 0,945       | 1           |
| Stoichiometric Factor           | 1,001097309  | Rxn Yield                | 0,998       | 1           |
| Materials Recovery Parameter    | 0,212926766  | 1/SF                     | 0,999       | 1           |
|                                 |              | MRP                      | 0,212926766 | 1           |
|                                 |              | RME                      | 0,201       | 1           |
| <i>Raw E-factor profile</i>     |              |                          |             |             |
| E-kernel                        | 0,05987595   |                          |             |             |
| E-excess                        | 0,001163011  | VMR                      | 0,771141135 |             |
| E-rxn solvent                   | 0            | (vector magnitude ratio) |             |             |
| E-catalyst                      | 0,064935065  |                          |             |             |
| E-work-up                       | 0            |                          |             |             |
| E-purification                  | 12,36363636  |                          |             |             |
|                                 | E-aux        |                          |             |             |
|                                 | 12,43        |                          |             |             |
| E-total                         | 12,48961039  |                          |             |             |
| <b>Corrected E-factor</b>       | <b>3,983</b> |                          |             |             |
| Yield                           | 99,8 %       |                          |             |             |
| AE                              | 94,5 %       |                          |             |             |
| PMI                             | 4,983        |                          |             |             |
| RME (global)                    | 20,1 %       |                          |             |             |

**Figure S1.** Sustainability metrics for the synthesis of 1 (Table 2, entry 1).

Reagents

☒ Link

|   | identifier*          | name                            | MF*          | MW        | density | purity* | ml       | g        | mmoles       | equiv.       |
|---|----------------------|---------------------------------|--------------|-----------|---------|---------|----------|----------|--------------|--------------|
| 1 | <input type="text"/> | 1,3-Diphenyl-2-propen-1-ol      | C15H14O      | 210.27556 |         | 100%    | 0        | 0.052569 | 0.25         | 1            |
| 2 | <input type="text"/> | Indole                          | C8H7N        | 117.15028 | 1.22    | 100%    | 0.024007 | 0.029288 | 0.25         | 1            |
| 3 | <input type="text"/> | Nickel(II) chloride hexahydrate | Cl2Ni · 6H2O | 237.68768 |         | 100%    | 0        | 0.0029   | 0.0122008847 | 0.0488035391 |
| 4 | <input type="text"/> | mcmimCl                         | C7H11ClN2O2  | 190.6270  |         | 100%    | 0        | 0.0024   | 0.0125900318 | 0.0503601273 |

Products

| identifier* | name      | MF*     | MW    | g     | mmoles       | g theor. | yield   |
|-------------|-----------|---------|-------|-------|--------------|----------|---------|
|             | Product 1 | C23H19N | 309.4 | 0.077 | 0.2488687782 | 0.07735  | 99.5475 |

Conditions

| Reagents | Name                            | mmoles | eq.  | Bp  | Hazard | Price |
|----------|---------------------------------|--------|------|-----|--------|-------|
|          | 1,3-Diphenyl-2-propen-1-ol      | 3.24   | 1    |     |        |       |
|          | Indole                          | 3.24   | 1    | 253 |        |       |
|          | Nickel(II) chloride hexahydrate | 0.15   | 0.04 |     |        |       |
|          | mcmimCl                         | 0.16   | 0.05 |     |        |       |

Yield

100

Price / availability

-8

Safety

-10

Technical setup

Possible items

Common set-up

Instruments for controlled addition of chemicals

Unconventional activation technique

Selected items

Common set-up

Temperature / time

Possible items

Heating, > 1h

Cooling, > 0°C

Cooling, < 0°C

Selected items

Heating, > 1h

Workup and purification

Possible items

Adding solvent

Simple filtration

Removal of solvent with bp < 150°C

Selected items

Adding solvent

Simple filtration

Removal of solvent with bp < 150°C

EcoScale

79

**Figure S2.** EcoScale for the synthesis of 1 (Table 2, entry 1).

|                                 |              |   |                          |             |             |
|---------------------------------|--------------|---|--------------------------|-------------|-------------|
| Actual Mass of Reagents         | 1,65         | g | Parameter                | Actual      | Ideal Limit |
| Stoichiometric Mass of Reagents | 1,65         | g | AE                       | 0,945       | 1           |
| Stoichiometric Factor           | 1,000619636  |   | Rxn Yield                | 0,988       | 1           |
| Materials Recovery Parameter    | 0,369127517  |   | 1/SF                     | 0,999       | 1           |
| <i>Raw E-factor profile</i>     |              |   | MRP                      | 0,369127517 | 1           |
| E-kernel                        | 0,070765086  |   | RME                      | 0,345       | 1           |
| E-excess                        | 0,000663485  |   | VMR                      | 0,790368533 |             |
| E-rxn solvent                   | 0            |   | (vector magnitude ratio) |             |             |
| E-catalyst                      | 0,071428571  |   |                          |             |             |
| E-work-up                       | 0            |   |                          |             |             |
| E-purification                  | 6,506493506  |   |                          |             |             |
| E-aux                           | 6,58         |   |                          |             |             |
| E-total                         | 6,649350649  |   |                          |             |             |
| <b>Corrected E-factor</b>       | <b>1,903</b> |   |                          |             |             |
| Yield                           | 98,8         | % |                          |             |             |
| AE                              | 94,5         | % |                          |             |             |
| PMI                             | 2,903        |   |                          |             |             |
| RME (global)                    | 34,5         | % |                          |             |             |

Figure S3. Sustainability metrics for the synthesis of 1 (Table 2, entry 2).

| Reagents |             |                            |            |           |         |         |          |          |        |        |
|----------|-------------|----------------------------|------------|-----------|---------|---------|----------|----------|--------|--------|
| Link     | identifier* | name                       | MF*        | MW        | density | purity* | ml       | g        | mmoles | equiv. |
| 1        |             | 1,3-Diphenyl-2-propen-1-ol | C15H14O    | 210.27556 |         | 100%    | 0        | 1.051378 | 5      | 1      |
| 2        |             | Indole                     | C8H7N      | 117.15028 | 1.22    | 100%    | 0.480124 | 0.585751 | 5      | 1      |
| 3        |             | bcmimCl                    | C7H9ClN2O4 | 220.61    |         | 100%    | 0        | 0.110305 | 0.5    | 0.1    |

  

| Products    |         |         |          |      |              |         |         |
|-------------|---------|---------|----------|------|--------------|---------|---------|
| identifier* | name    | MF*     | MW       | g    | mmoles       | g theor | yield   |
|             | C23H19N | C23H19N | 309.4120 | 1.54 | 4.9771825268 | 1.54706 | 99.5437 |

  

| Conditions |                            |        |     |     |        |       |
|------------|----------------------------|--------|-----|-----|--------|-------|
| Reagents   | Name                       | mmoles | eq. | Bp  | Hazard | Price |
|            | 1,3-Diphenyl-2-propen-1-ol | 3.24   | 1   |     |        |       |
|            | Indole                     | 3.24   | 1   | 253 |        |       |
|            | bcmimCl                    | 0.32   | 0.1 |     |        |       |

  

|                         |                                                                                                            |                                                                                             |    |
|-------------------------|------------------------------------------------------------------------------------------------------------|---------------------------------------------------------------------------------------------|----|
| Yield                   | 100                                                                                                        |                                                                                             |    |
| Price / availability    |                                                                                                            | -8                                                                                          |    |
| Safety                  |                                                                                                            | 0                                                                                           |    |
| Technical setup         | Possible items<br>Any additional special glassware<br>(Inert) gas atmosphere<br>Glove box                  | Selected items<br>Common set-up                                                             | 0  |
| Temperature / time      | Possible items<br>Room temperature, < 1h<br>Room temperature, < 24h<br>Heating, < 1h                       | Selected items<br>Heating, > 1h                                                             | -3 |
| Workup and purification | Possible items<br>Simple titration<br>Removal of solvent with bp < 150°C<br>Crystallization and filtration | Selected items<br>Adding solvent<br>Simple filtration<br>Removal of solvent with bp < 150°C | 0  |

  

| EcoScale |    |
|----------|----|
|          | 89 |

Figure S4. EcoScale for the synthesis of 1 (Table 2, entry 2).

|                                 |             |   |                          |             |             |
|---------------------------------|-------------|---|--------------------------|-------------|-------------|
| Actual Mass of Reagents         | 0,222       | g | Parameter                | Actual      | Ideal Limit |
| Stoichiometric Mass of Reagents | 0,16        | g | AE                       | 0,945       | 1           |
| Stoichiometric Factor           | 1,357799942 |   | Rxn Yield                | 0,887       | 1           |
| Materials Recovery Parameter    | 0,087127159 |   | 1/SF                     | 0,736       | 1           |
| <i>Raw E-factor profile</i>     |             |   | MRP                      | 0,087127159 | 1           |
| E-kernel                        | 0,193429095 |   | RME                      | 0,054       | 1           |
| E-excess                        | 0,427008861 |   | VMR                      | 0,668150897 |             |
| E-rxn solvent                   | 7,299270073 |   | (vector magnitude ratio) |             |             |
| E-catalyst                      | 0,102189781 |   |                          |             |             |
| E-work-up                       | 46,80291971 |   |                          |             |             |
| E-purification                  | 0           |   |                          |             |             |
| E-aux                           | 54,20       |   |                          |             |             |
| E-total                         | 54,82481752 |   |                          |             |             |
| Corrected E-factor              | 17,599      |   |                          |             |             |
| Yield                           | 88,7        | % |                          |             |             |
| AE                              | 94,5        | % |                          |             |             |
| PMI                             | 18,599      |   |                          |             |             |
| RME (global)                    | 5,4         | % |                          |             |             |

Figure S5. Sustainability metrics for the synthesis of 1 (Table 2, entry 3).

Reagents

☒ Link

|   | identifier*          | name                           | MF*        | MW        | density | purity* | ml       | g        | mmoles       | equiv.       |
|---|----------------------|--------------------------------|------------|-----------|---------|---------|----------|----------|--------------|--------------|
| 1 | <input type="text"/> | 1,3-Diphenyl-2-propen-1-ol     | C15H14O    | 210.2756  |         | 100%    | 0        | 0.105138 | 0.5000000000 | 1            |
| 2 | <input type="text"/> | Indole                         | C8H7N      | 117.15028 | 1.22    | 100%    | 0.096025 | 0.11715  | 1.0000000000 | 2            |
| 3 | <input type="text"/> | Iron(III) chloride hexahydrate | H12O6Cl3Fe | 270.29768 |         | 100%    | 0        | 0.013515 | 0.0500000000 | 0.1          |
| 4 | <input type="text"/> | Water                          | H2O        | 18.01528  | 1       | 100%    | 10       | 10       | 555.08435061 | 1110.1687012 |

Products

identifier\*

name

MF\*

MW

g

mmoles

g theor

yield

C23H19N

C23H19N

309.412

0.137

0.4427753286

0.154706

88.5551

Conditions

| Reagents | Name                           | mmoles  | eq.     | Bp  | Hazard | Price |
|----------|--------------------------------|---------|---------|-----|--------|-------|
|          | 1,3-Diphenyl-2-propen-1-ol     | 3.64    | 1       |     |        |       |
|          | Indole                         | 7.29    | 2       | 253 |        |       |
|          | Iron(III) chloride hexahydrate | 0.36    | 0.1     |     |        |       |
|          | Water                          | 4051.71 | 1110.16 |     |        |       |

Yield

-6

Price / availability

-8

Safety

0

Technical setup

Possible items

Any additional special glassware (Inert) gas atmosphere

Glove box

Selected items

Common set-up

Temperature / time

Possible items

Heating, > 1h

Cooling to 0°C

Cooling, < 0°C

Selected items

Heating, > 1h

Workup and purification

Possible items

Simple filtration

Removal of solvent with bp < 150°C

Crystallization and filtration

Selected items

Liquid - liquid extraction or washing

Classical chromatography

Removal of solvent with bp < 150°C

EcoScale

Figure S6. EcoScale for the synthesis of 1 (Table 2, entry 3).

|                                 |              |   |                          |            |             |
|---------------------------------|--------------|---|--------------------------|------------|-------------|
| Actual Mass of Reagents         | 0,193        | g | Parameter                | Actual     | Ideal Limit |
| Stoichiometric Mass of Reagents | 0,16         | g | AE                       | 0,945      | 1           |
| Stoichiometric Factor           | 1,18042968   |   | Rxn Yield                | 0,958      | 1           |
| Materials Recovery Parameter    | 0,54985755   |   | 1/SF                     | 0,847      | 1           |
| <i>Raw E-factor profile</i>     |              |   | MRP                      | 0,54985755 | 1           |
| E-kernel                        | 0,104728284  |   | RME                      | 0,422      | 1           |
| E-excess                        | 0,19932577   |   | VMR                      | 0,77567565 |             |
| E-rxn solvent                   | 5,391891892  |   | (vector magnitude ratio) |            |             |
| E-catalyst                      | 0            |   |                          |            |             |
| E-work-up                       | 0            |   |                          |            |             |
| E-purification                  | 0            |   |                          |            |             |
| E-aux                           | 5,39         |   |                          |            |             |
| E-total                         | 5,695945946  |   |                          |            |             |
| <b>Corrected E-factor</b>       | <b>1,372</b> |   |                          |            |             |
| Yield                           | 95,8         | % |                          |            |             |
| AE                              | 94,5         | % |                          |            |             |
| PMI                             | 2,372        |   |                          |            |             |
| RME (global)                    | 42,2         | % |                          |            |             |

Figure S7. Sustainability metrics for the synthesis of 1 (Table 2, entry 4).

| Reagents                          |             |                                   |         |            |         |              |          |          |              |              |
|-----------------------------------|-------------|-----------------------------------|---------|------------|---------|--------------|----------|----------|--------------|--------------|
| Link                              | identifier* | name                              | MF*     | MW         | density | purity*      | ml       | g        | mmoles       | equiv.       |
| 1                                 |             | 1,3-Diphenyl-2-propen-1-ol        | C15H14O | 210.27566  |         | 100%         | 0        | 0.105138 | 0.5          | 1            |
| 2                                 |             | Indole                            | C8H7N   | 117.15028  | 1.22    | 100%         | 0.072019 | 0.087863 | 0.75         | 1.5          |
| 3                                 |             | 1,1,1,3,3,3-Hexafluoro-2-propanol | C3H2F6O | 168.038698 | 1.596   | 100%         | 0.5      | 0.798    | 4.7489061120 | 9.4978122241 |
| Products                          |             |                                   |         |            |         |              |          |          |              |              |
|                                   | identifier* | name                              | MF*     | MW         | g       | mmoles       | g theor. | yield    |              |              |
|                                   |             | C23H19N                           | C23H19N | 309.421    | 0.148   | 0.4783127195 | 0.154711 | 95.6622  |              |              |
| Conditions                        |             |                                   |         |            |         |              |          |          |              |              |
| Reagents                          |             |                                   |         |            |         |              |          |          |              |              |
| Name                              | mmoles      | eq.                               | Bp      | Hazard     | Price   |              |          |          |              |              |
| 1,3-Diphenyl-2-propen-1-ol        | 3.37        | 1                                 |         |            |         |              |          |          |              |              |
| Indole                            | 5.06        | 1.5                               | 253     |            |         |              |          |          |              |              |
| 1,1,1,3,3,3-Hexafluoro-2-propanol | 32.08       | 9.49                              | 59      |            |         |              |          |          |              |              |
| Yield                             | 96          |                                   |         |            |         |              |          |          |              |              |
| Price / availability              |             |                                   |         |            |         |              |          |          |              | -2           |
| Safety                            |             |                                   |         |            |         |              |          |          |              | -8           |
| Technical setup                   |             |                                   |         |            |         |              |          |          |              | 0            |
| Temperature / time                |             |                                   |         |            |         |              |          |          |              | -3           |
| Workup and purification           |             |                                   |         |            |         |              |          |          |              | -10          |
| EcoScale                          |             |                                   |         |            |         |              |          |          |              | 77           |

Figure S8. EcoScale for the synthesis of 1 (Table 2, entry 4).

|                                 |             |       |                          |             |             |
|---------------------------------|-------------|-------|--------------------------|-------------|-------------|
| Actual Mass of Reagents         | 0,327       | g     | Parameter                | Actual      | Ideal Limit |
| Stoichiometric Mass of Reagents | 0,33        | g     | AE                       | 0,945       | 1           |
| Stoichiometric Factor           | 1,000001309 |       | Rxn Yield                | 0,951       | 1           |
| Materials Recovery Parameter    | 0,011607476 |       | 1/SF                     | 1,000       | 1           |
| <i>Raw E-factor profile</i>     |             |       | MRP                      | 0,011607476 | 1           |
| E-kernel                        | 0,112243442 |       | RME                      | 0,010       | 1           |
| E-excess                        | 1,45585E-06 |       | VMR                      | 0,748124397 |             |
| E-rxn solvent                   | 4,523809524 |       | (vector magnitude ratio) |             |             |
| E-catalyst                      | 0,032312925 |       |                          |             |             |
| E-work-up                       | 90,15306122 |       |                          |             |             |
| E-purification                  | 0           |       |                          |             |             |
|                                 | E-aux       | 94,71 |                          |             |             |
| E-total                         | 94,82142857 |       |                          |             |             |
| Corrected E-factor              | 94,821      |       |                          |             |             |
| Yield                           | 95,1        | %     |                          |             |             |
| AE                              | 94,5        | %     |                          |             |             |
| PMI                             | 95,821      |       |                          |             |             |
| RME (global)                    | 1,0         | %     |                          |             |             |

Figure S9. Sustainability metrics for the synthesis of 1 (Table 2, entry 5).

Reagents

☒ Link

|   | identifier*          | name                               | MF*           | MW        | density | purity* | ml       | g        | mmoles       | equiv.       |  |
|---|----------------------|------------------------------------|---------------|-----------|---------|---------|----------|----------|--------------|--------------|--|
| 1 | <input type="text"/> | 1,3-Diphenyl-2-propen-1-ol         | C15H14O       | 210.27556 |         | 100%    | 0        | 0.210276 | 1            | 1            |  |
| 2 | <input type="text"/> | Indole                             | C8H7N         | 117.15028 | 1.22    | 100%    | 0.096025 | 0.11715  | 1            | 1            |  |
| 3 | <input type="text"/> | p-Toluenesulfonic acid monohydrate | C7H8O3S · H2O | 190.214   |         | 100%    | 0        | 0.009511 | 0.05         | 0.05         |  |
| 4 | <input type="text"/> | Dichloromethane                    | CH2Cl2        | 84.93288  | 1.325   | 100%    | 1        | 1.325    | 15.600554225 | 15.600554225 |  |

Products

identifier\*

name

MF\*

MW

g

mmoles

g theor

yield

C23H19N

C23H19N

309.412

0.294

0.9501893914

0.309412

95.0189

Conditions

Reagents

| Name                               | mmoles | eq.  | Bp  | Hazard | Price |
|------------------------------------|--------|------|-----|--------|-------|
| 1,3-Diphenyl-2-propen-1-ol         | 3.4    | 1    |     |        |       |
| Indole                             | 3.4    | 1    | 253 |        |       |
| p-Toluenesulfonic acid monohydrate | 0.17   | 0.05 |     |        |       |
| Dichloromethane                    | 53.06  | 15.6 | 39  |        |       |

Yield

95

-2

Price / availability

-3

Safety

0

Technical setup

Possible items

Common set-up

Instruments for controlled addition of chemicals

Unconventional activation technique

Selected items

Common set-up

0

Temperature / time

Possible items

Heating, > 1h

Cooling to 0°C

Cooling, < 0°C

Selected items

Heating, > 1h

-3

Workup and purification

Possible items

None

Cooling to room temperature

Adding solvent

Selected items

Liquid - liquid extraction or washing

Classical chromatography

-13

EcoScale

79

Figure S10. EcoScale for the synthesis of 1 (Table 2, entry 5).

|                                 |             |   |                          |             |             |
|---------------------------------|-------------|---|--------------------------|-------------|-------------|
| Actual Mass of Reagents         | 0,0327      | g | Parameter                | Actual      | Ideal Limit |
| Stoichiometric Mass of Reagents | 0,03        | g | AE                       | 0,945       | 1           |
| Stoichiometric Factor           | 1,000001309 |   | Rxn Yield                | 0,961       | 1           |
| Materials Recovery Parameter    | 0,00304682  |   | 1/SF                     | 1,000       | 1           |
| <i>Raw E-factor profile</i>     |             |   | MRP                      | 0,00304682  | 1           |
| E-kernel                        | 0,10100866  |   | RME                      | 0,003       | 1           |
| E-excess                        | 1,44115E-06 |   | VMR                      | 0,750572138 |             |
| E-rxn solvent                   | 8,417508418 |   | (vector magnitude ratio) |             |             |
| E-catalyst                      | 0           |   |                          |             |             |
| E-work-up                       | 624,3703704 |   |                          |             |             |
| E-purification                  | 91,11111111 |   |                          |             |             |
| E-aux                           | 723,90      |   |                          |             |             |
| E-total                         | 724         |   |                          |             |             |
| Corrected E-factor              | 360,364     |   |                          |             |             |
| Yield                           | 96,1        | % |                          |             |             |
| AE                              | 94,5        | % |                          |             |             |
| PMI                             | 361,364     |   |                          |             |             |
| RME (global)                    | 0,3         | % |                          |             |             |

Figure S11. Sustainability metrics for the synthesis of 1 (Table 2, entry 6).

| Reagents |             |                            |           |           |         |         |          |          |              |              |
|----------|-------------|----------------------------|-----------|-----------|---------|---------|----------|----------|--------------|--------------|
| Link     | identifier* | name                       | MF*       | MW        | density | purity* | ml       | g        | mmoles       | equiv.       |
| 1        | +           | 1,3-Diphenyl-2-propen-1-ol | C15H14O   | 210.27556 |         | 100%    | 0        | 0.021028 | 0.1          | 1            |
| 2        | +           | Indole                     | C8H7N     | 117.15028 | 1.22    | 100%    | 0.009602 | 0.011715 | 0.1          | 1            |
| 3        | +           | DL-Lactic acid             | C3H6O3    | 90.07884  |         | 100%    | 0        | 0.14     | 1.5541940815 | 15.541940815 |
| 4        | +           | Choline chloride           | C5H14ClNO | 139.62526 |         | 100%    | 0        | 0.11     | 0.7878230629 | 7.878230629  |

  

| Products    |           |         |       |        |              |          |              |
|-------------|-----------|---------|-------|--------|--------------|----------|--------------|
| identifier* | name      | MF*     | MW    | g      | mmoles       | g theor. | yield        |
|             | Product 1 | C23H19N | 309.4 | 0.0297 | 0.0959922430 | 0.03094  | 95.992200000 |

  

| Conditions |                            |        |       |     |        |       |
|------------|----------------------------|--------|-------|-----|--------|-------|
| Reagents   | Name                       | mmoles | eq.   | Bp  | Hazard | Price |
|            | 1,3-Diphenyl-2-propen-1-ol | 3.36   | 1     |     |        |       |
|            | Indole                     | 3.36   | 1     | 253 |        |       |
|            | DL-Lactic acid             | 52.32  | 15.54 |     |        |       |
|            | Choline chloride           | 26.52  | 7.87  |     |        |       |

  

|                         |                                                                                                                            |                                                                                                              |
|-------------------------|----------------------------------------------------------------------------------------------------------------------------|--------------------------------------------------------------------------------------------------------------|
| Yield                   | 96                                                                                                                         | -2                                                                                                           |
| Price / availability    |                                                                                                                            | -13                                                                                                          |
| Safety                  |                                                                                                                            | 0                                                                                                            |
| Technical setup         | Possible items<br>Common set-up<br>Instruments for controlled addition of chemicals<br>Unconventional activation technique | Selected items<br>Common set-up<br>0                                                                         |
| Temperature / time      | Possible items<br>Heating, > 1h<br>Cooling to 0°C<br>Cooling, < 0°C                                                        | Selected items<br>Heating, > 1h<br>-3                                                                        |
| Workup and purification | Possible items<br>Sublimation<br>Liquid - liquid extraction or washing<br>Classical chromatography                         | Selected items<br>Adding solvent<br>Liquid - liquid extraction or washing<br>Classical chromatography<br>-13 |
| EcoScale                | 69                                                                                                                         |                                                                                                              |

Figure S12. EcoScale for the synthesis of 1 (Table 2, entry 6).



## Differential Scanning Calorimetry traces

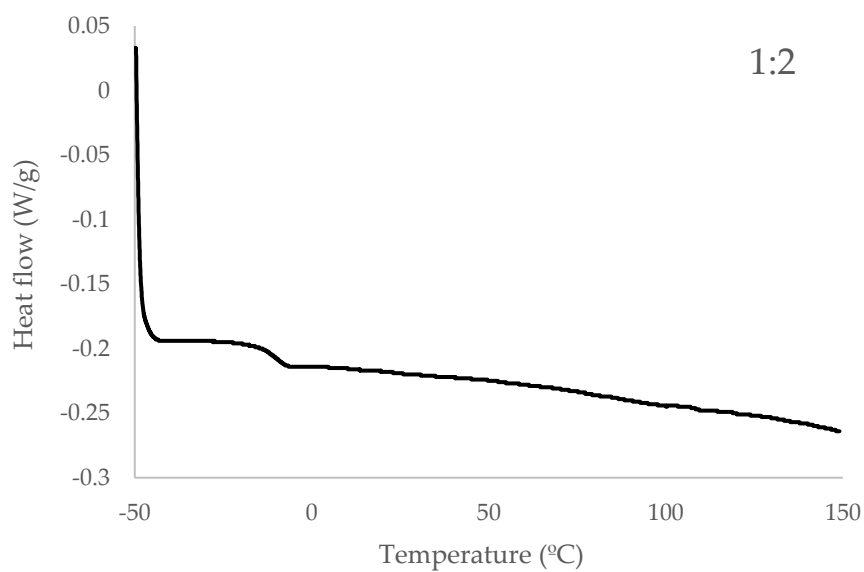

Figure S13. DSC trace of the 1:2 mcmimCl:NiCl<sub>2</sub> mixture (scanning rate 5 °C/min)

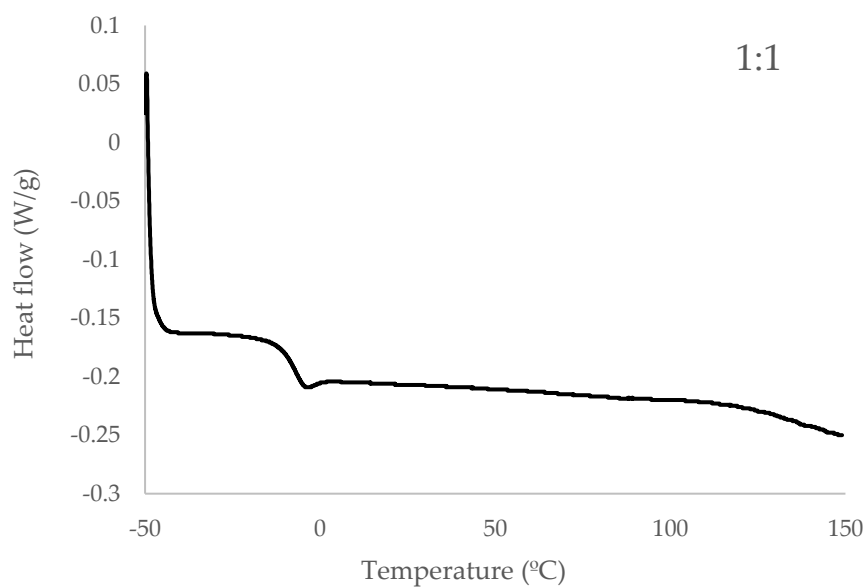

Figure S14. DSC trace of the 1:1 mcmimCl:NiCl<sub>2</sub> mixture (scanning rate 5 °C/min)

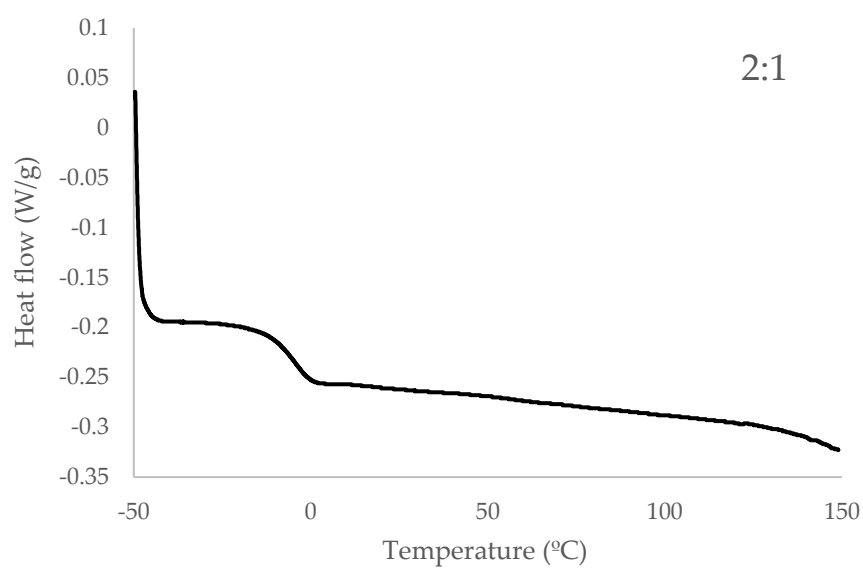

Figure S15. DSC trace of the 2:1 mcmimCl:NiCl<sub>2</sub> mixture (scanning rate 5 °C/min)

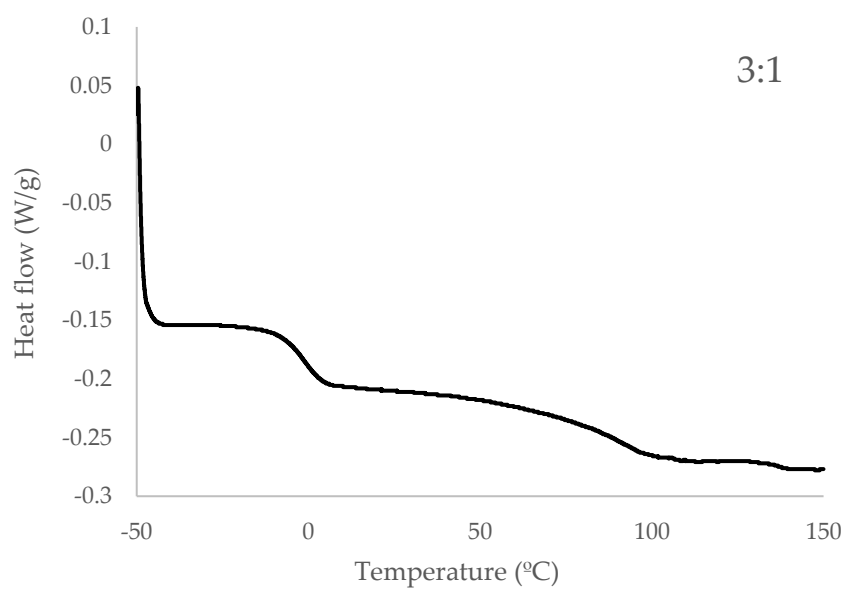

Figure S16. DSC trace of the 3:1 mcmimCl:NiCl<sub>2</sub> mixture (scanning rate 5 °C/min)

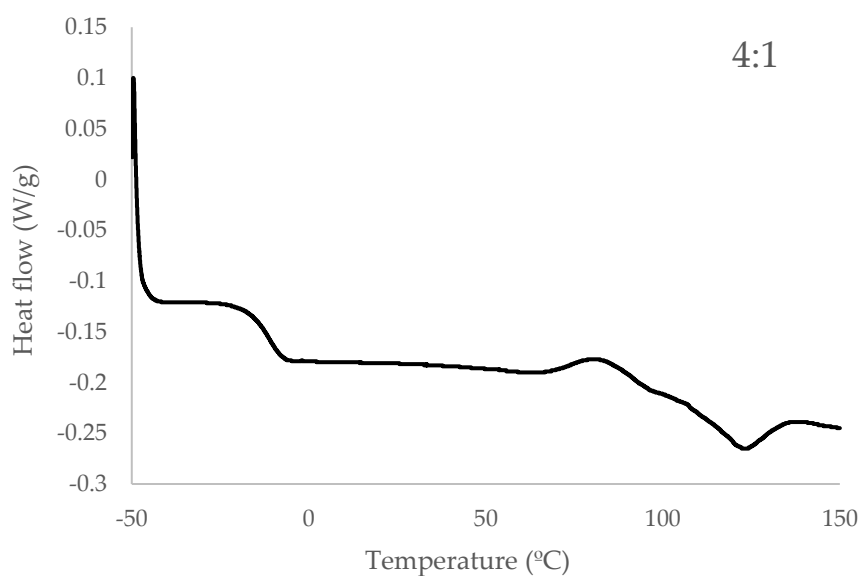

Figure S17. DSC trace of the 4:1 mcmimCl:NiCl<sub>2</sub> mixture (scanning rate 5 °C/min)

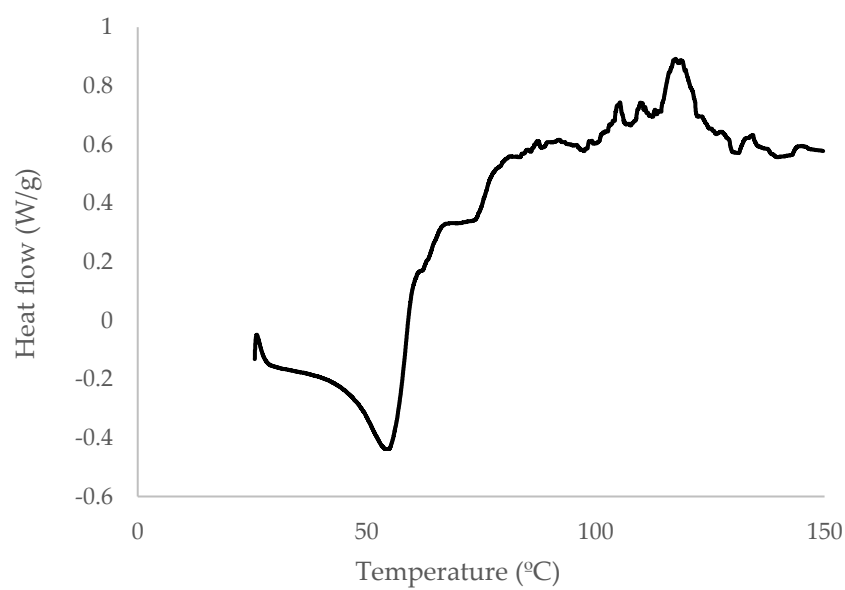

Figure S18. DSC trace of the 1:1 mcmimCl:NiCl<sub>2</sub>·6H<sub>2</sub>O mixture (scanning rate 5 °C/min)

## XPS analyses

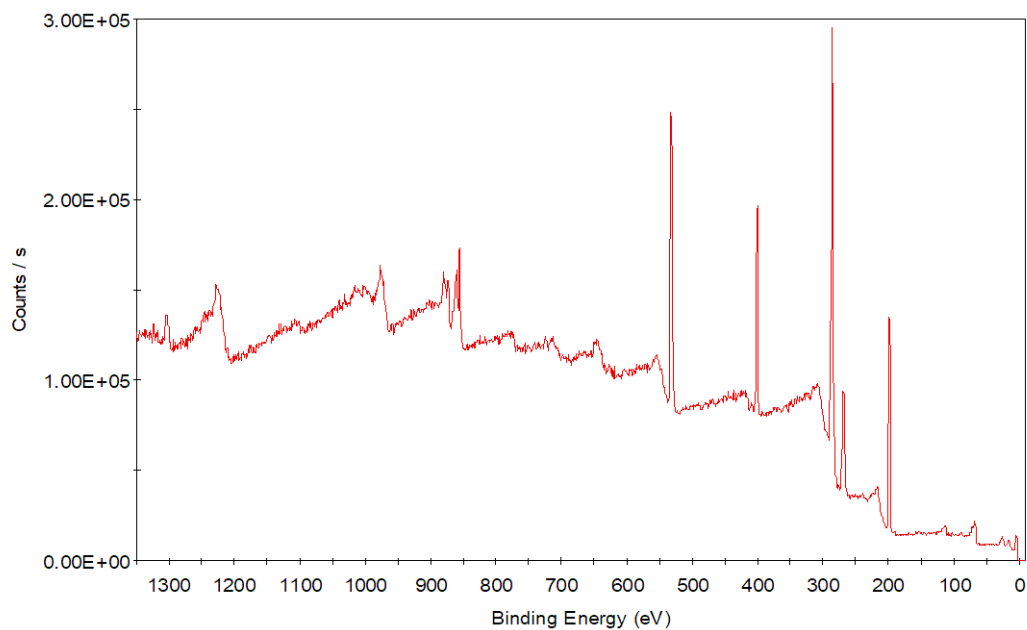

Figure S19. XPS survey of the 2:1 mcmimCl:NiCl<sub>2</sub> mixture

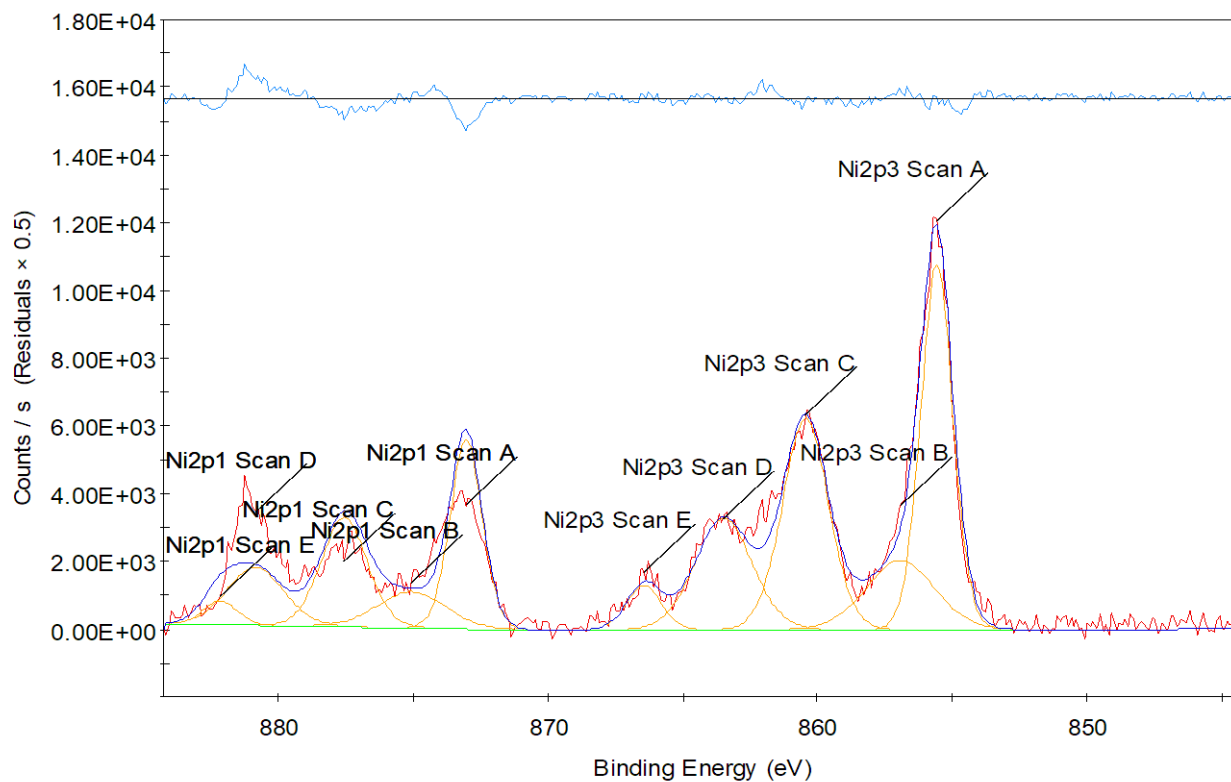

Figure S20. High resolution XPS Ni 2p scan of the 2:1 mcmimCl:NiCl<sub>2</sub> mixture

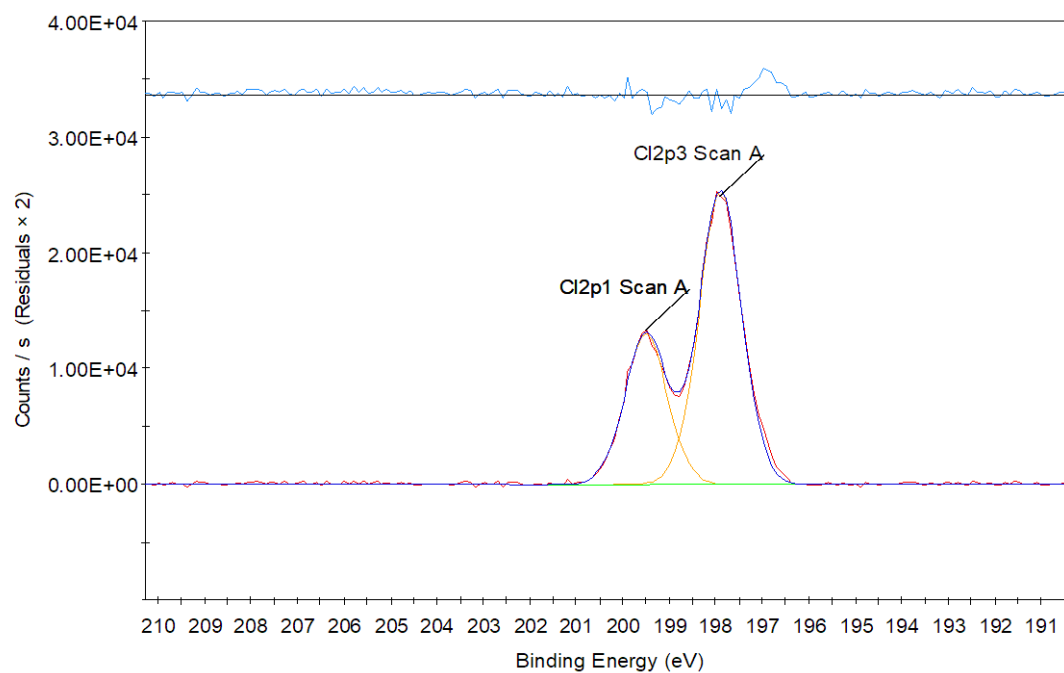

Figure S21. High resolution XPS Cl 2p scan of the 2:1 mcmimCl:NiCl<sub>2</sub> mixture

# NMR spectra

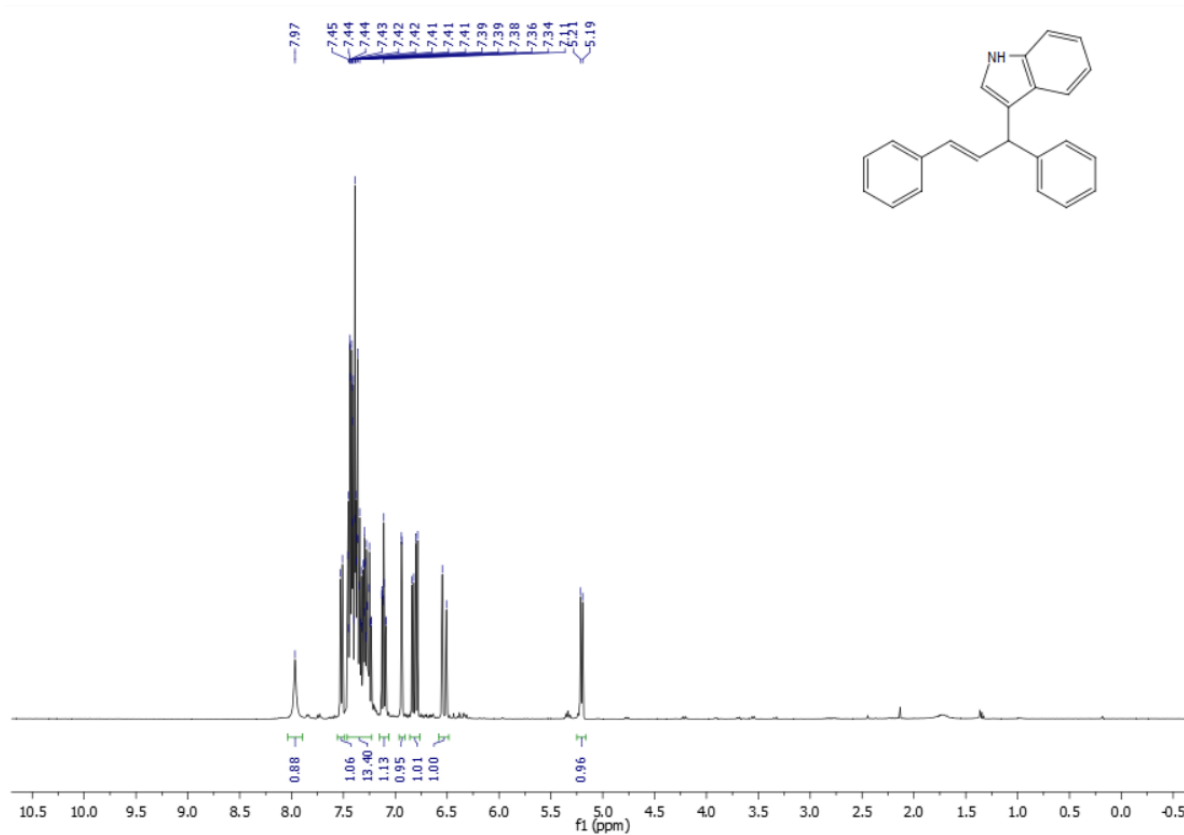

Figure S22. <sup>1</sup>H NMR spectrum of (E)-3-(1,3-diphenylallyl)-1H-indole (1)

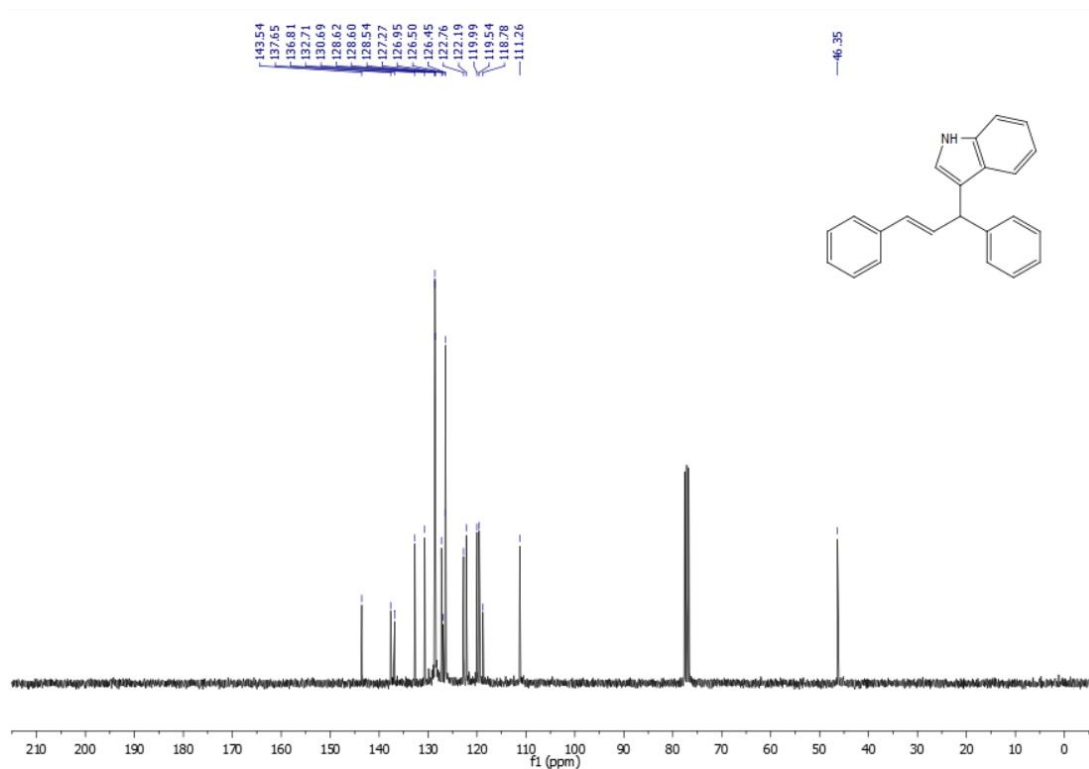

Figure S23. <sup>13</sup>C NMR spectrum of (E)-3-(1,3-diphenylallyl)-1H-indole (1)

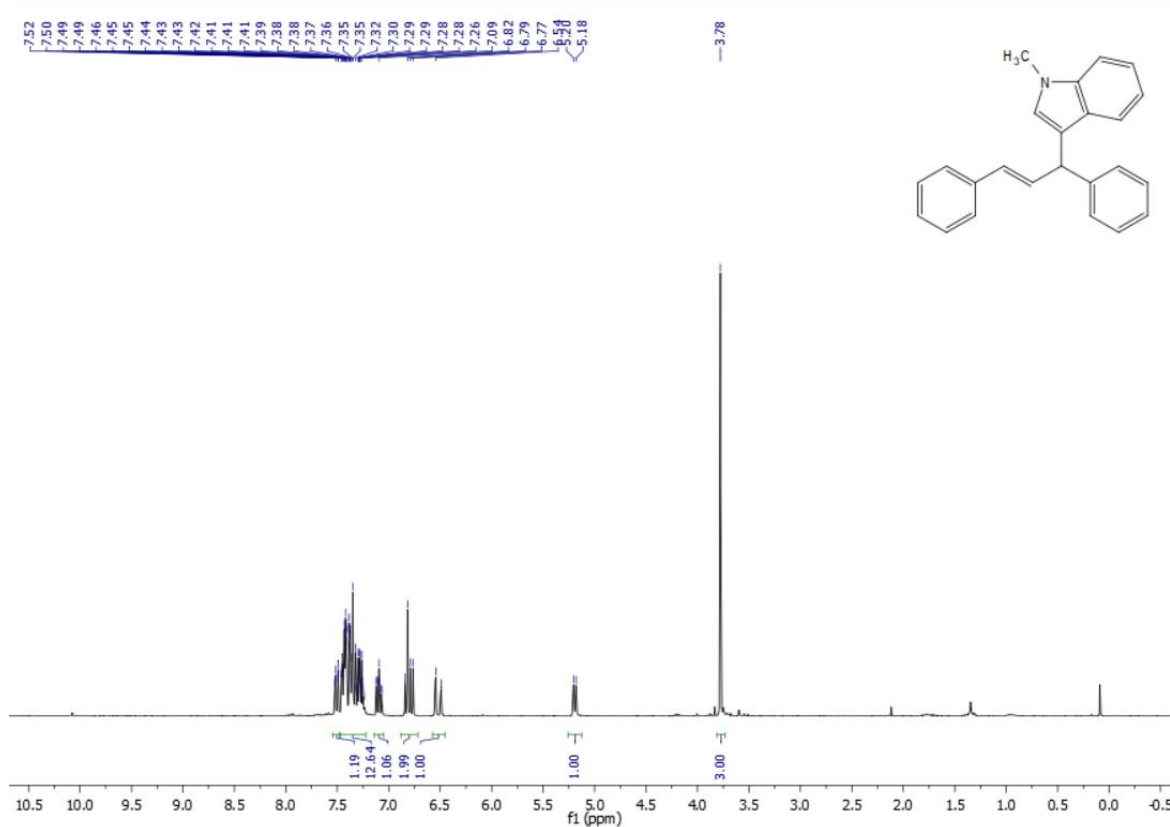

Figure S24. <sup>1</sup>H NMR spectrum of (E)-3-(1,3-diphenylallyl)-1-methyl-1H-indole (2)

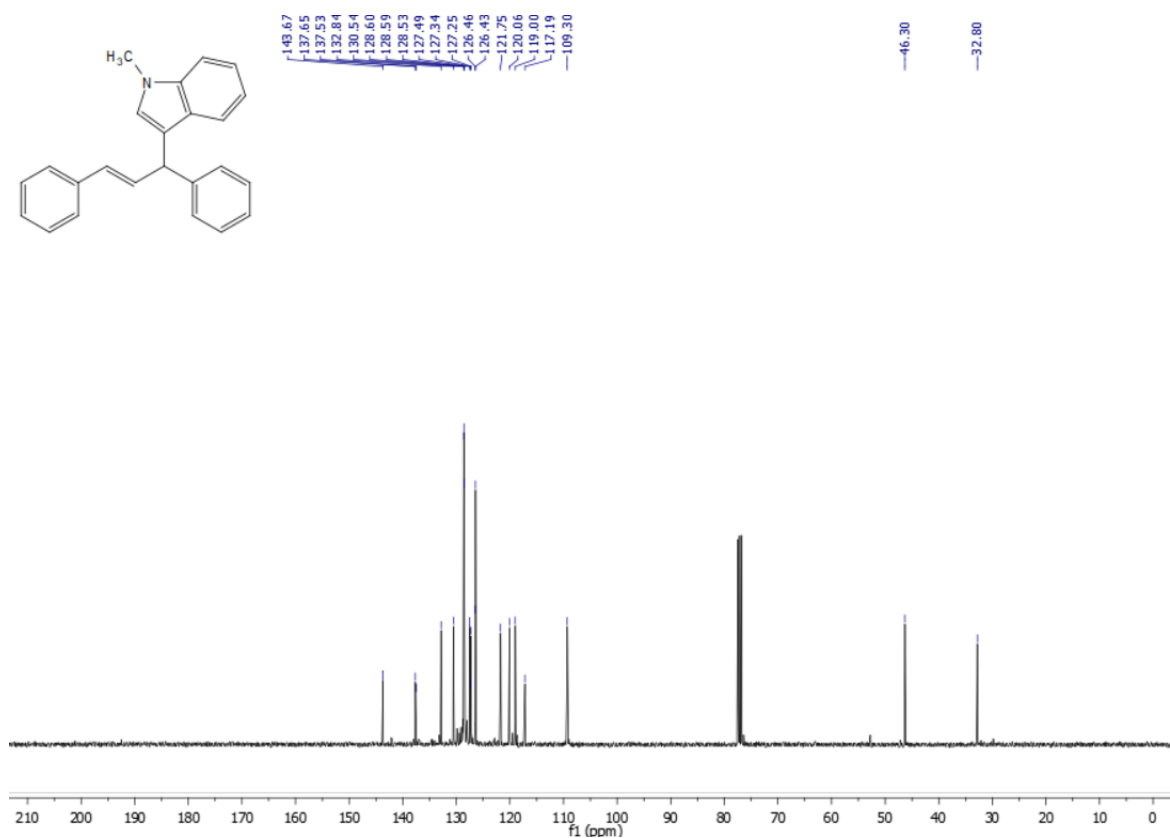

Figure S25. <sup>13</sup>C NMR spectrum of (E)-3-(1,3-diphenylallyl)-1-methyl-1H-indole (2)

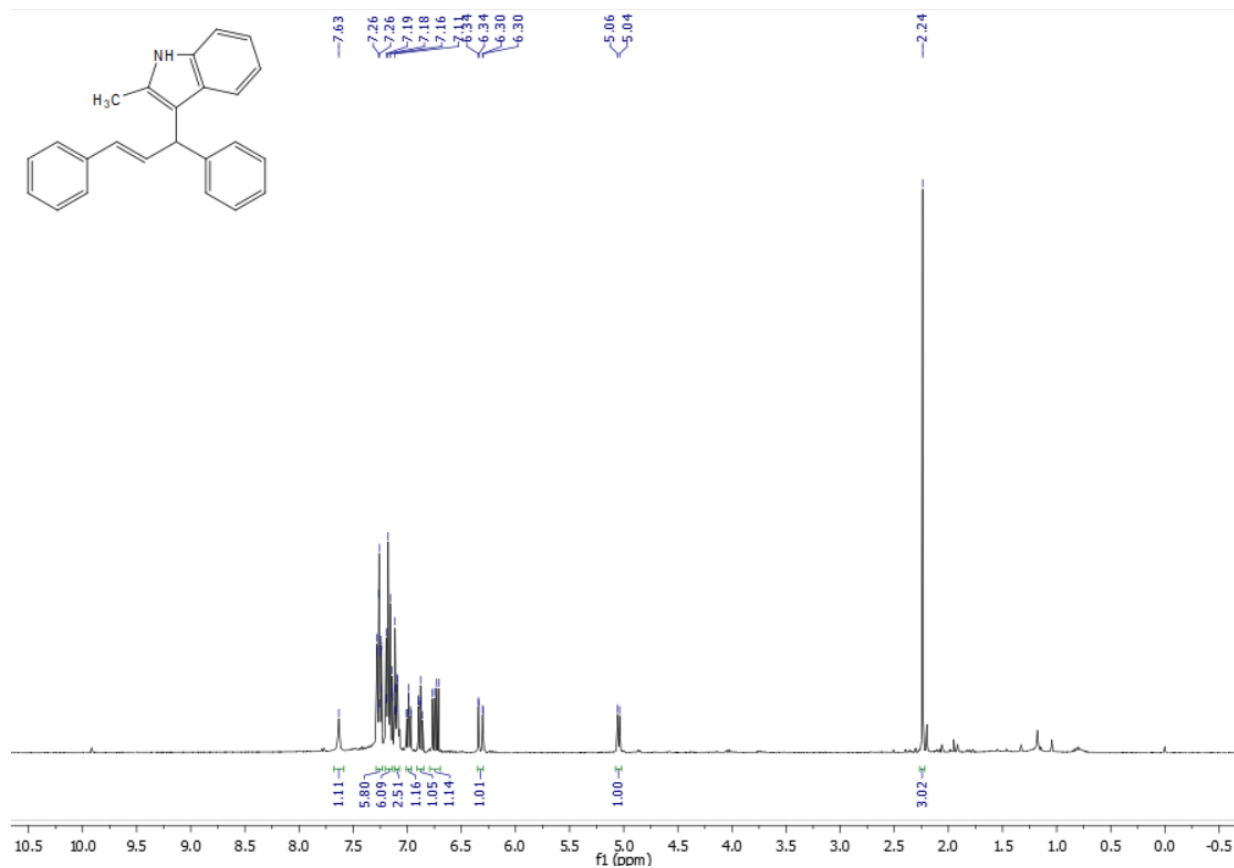

Figure S26. <sup>1</sup>H NMR spectrum of (E)-3-(1,3-diphenylallyl)-2-methyl-1H-indole (3)

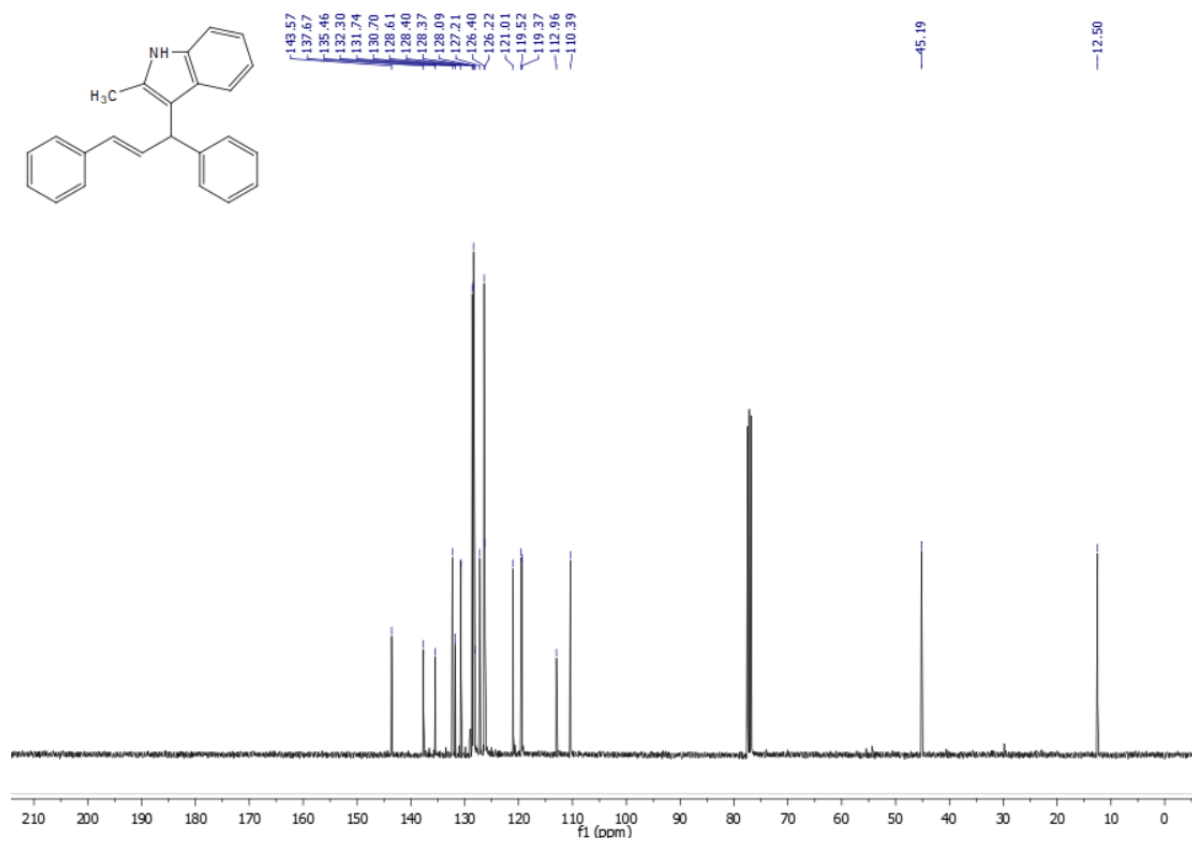

Figure S27. <sup>13</sup>C NMR spectrum of (E)-3-(1,3-diphenylallyl)-2-methyl-1H-indole (3)



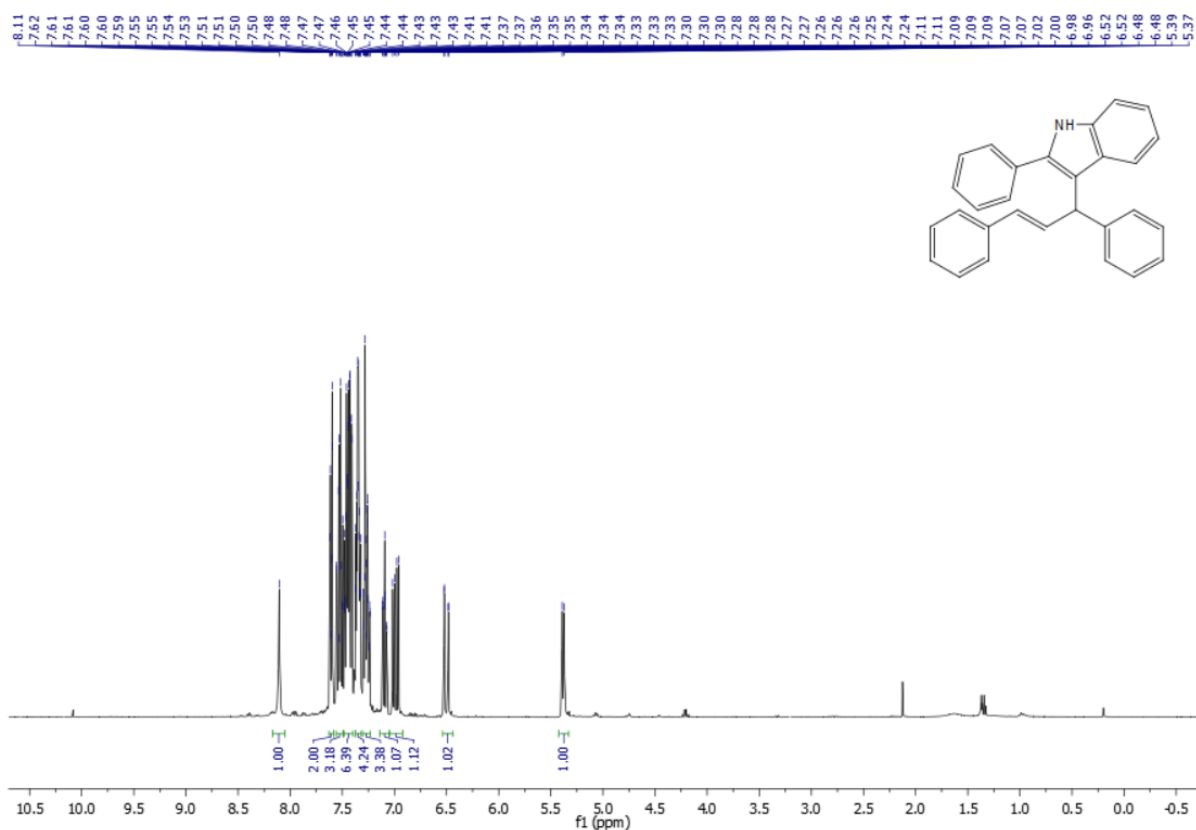

Figure S28. <sup>1</sup>H NMR spectrum of (E)-3-(1,3-diphenylallyl)-2-phenyl-1H-indole (4)

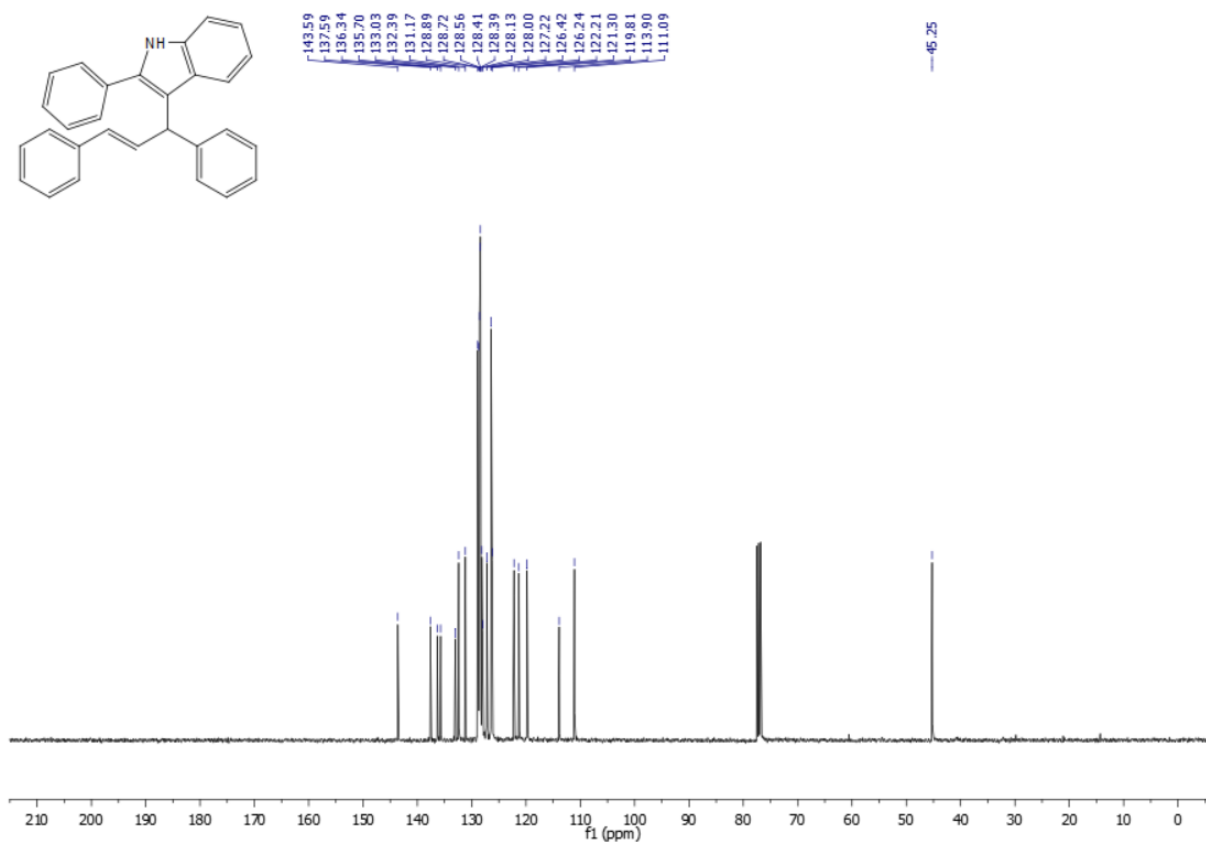

Figure S29. <sup>13</sup>C NMR spectrum of (E)-3-(1,3-diphenylallyl)-2-phenyl-1H-indole (4)

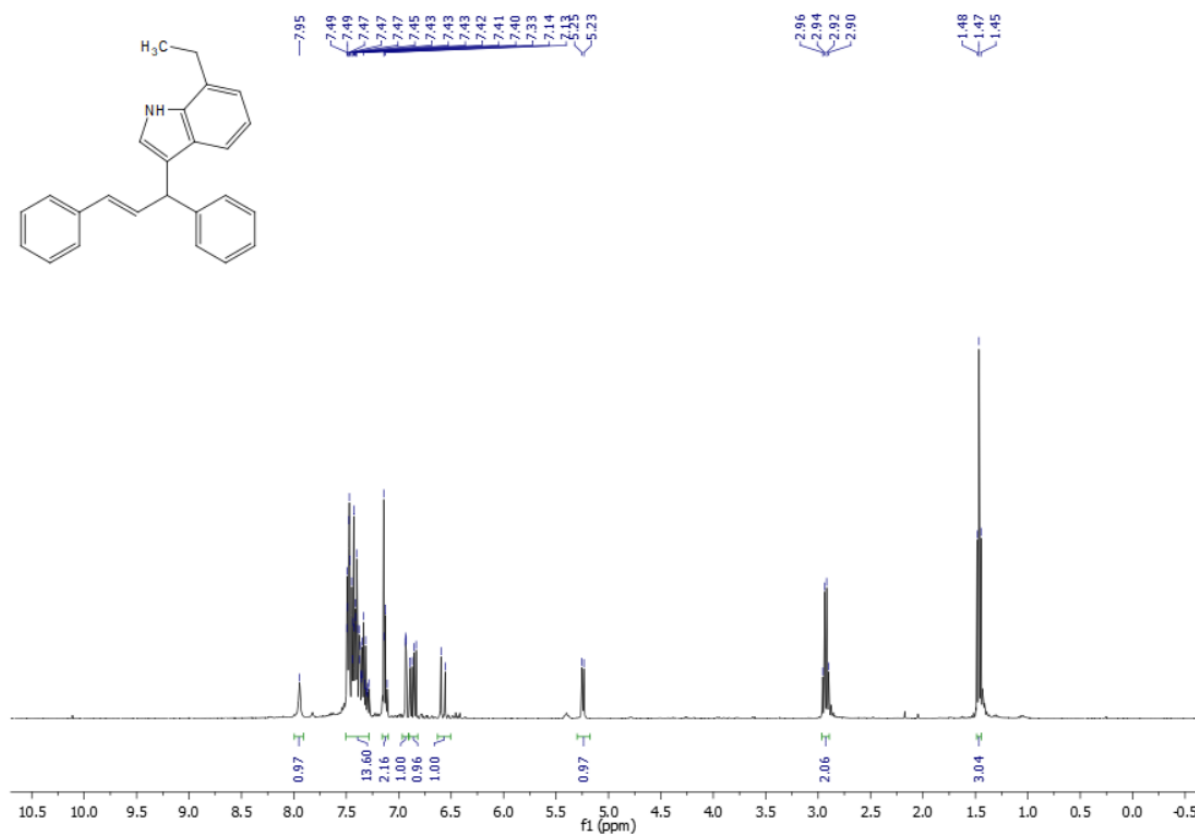

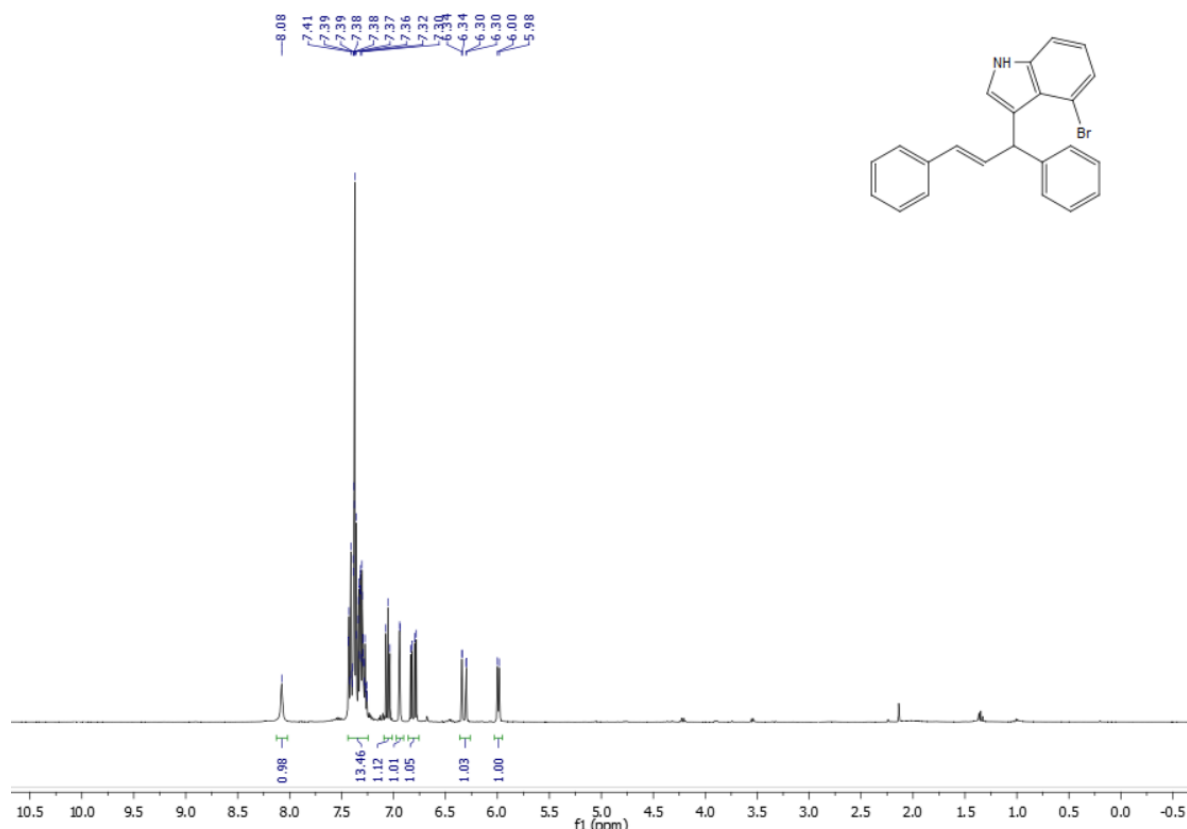

Figure S32. <sup>1</sup>H NMR spectrum of (E)-4-bromo-3-(1,3-diphenylallyl)-1H-indole (6)

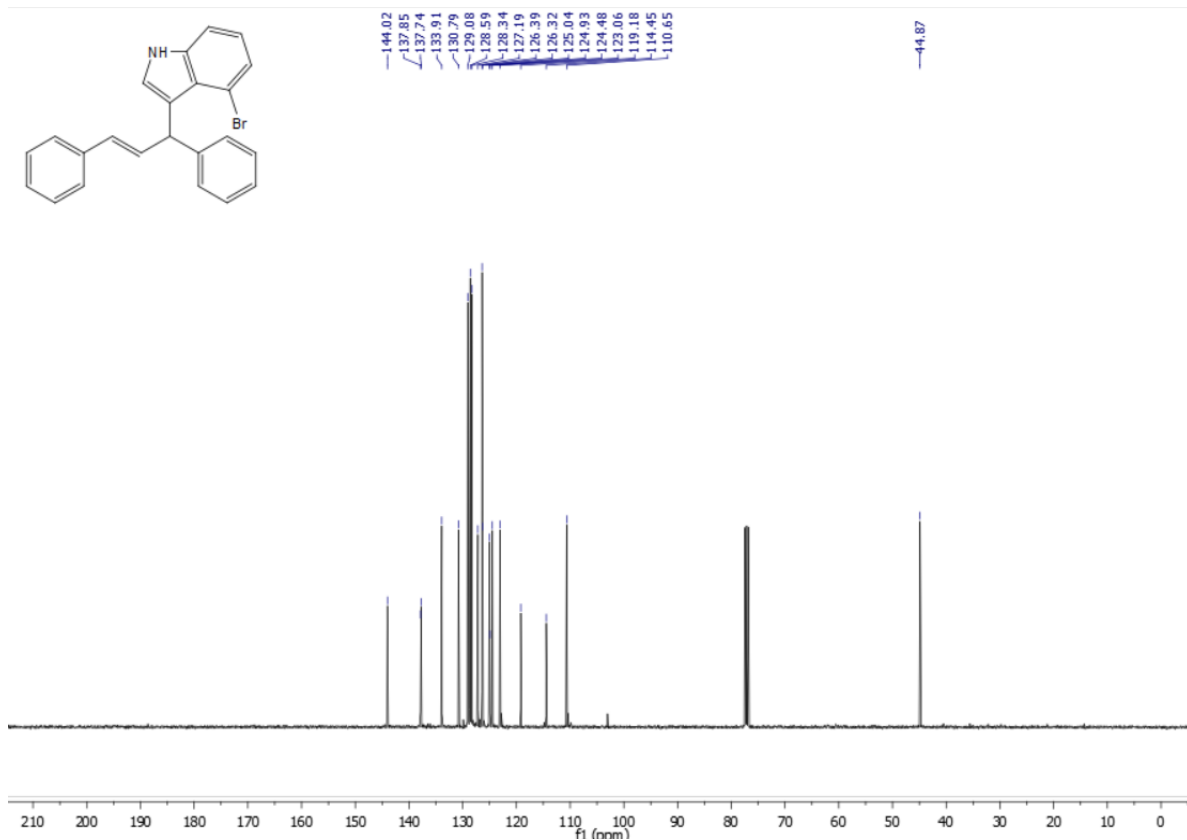

Figure S33. <sup>13</sup>C NMR spectrum of (E)-4-bromo-3-(1,3-diphenylallyl)-1H-indole (6)

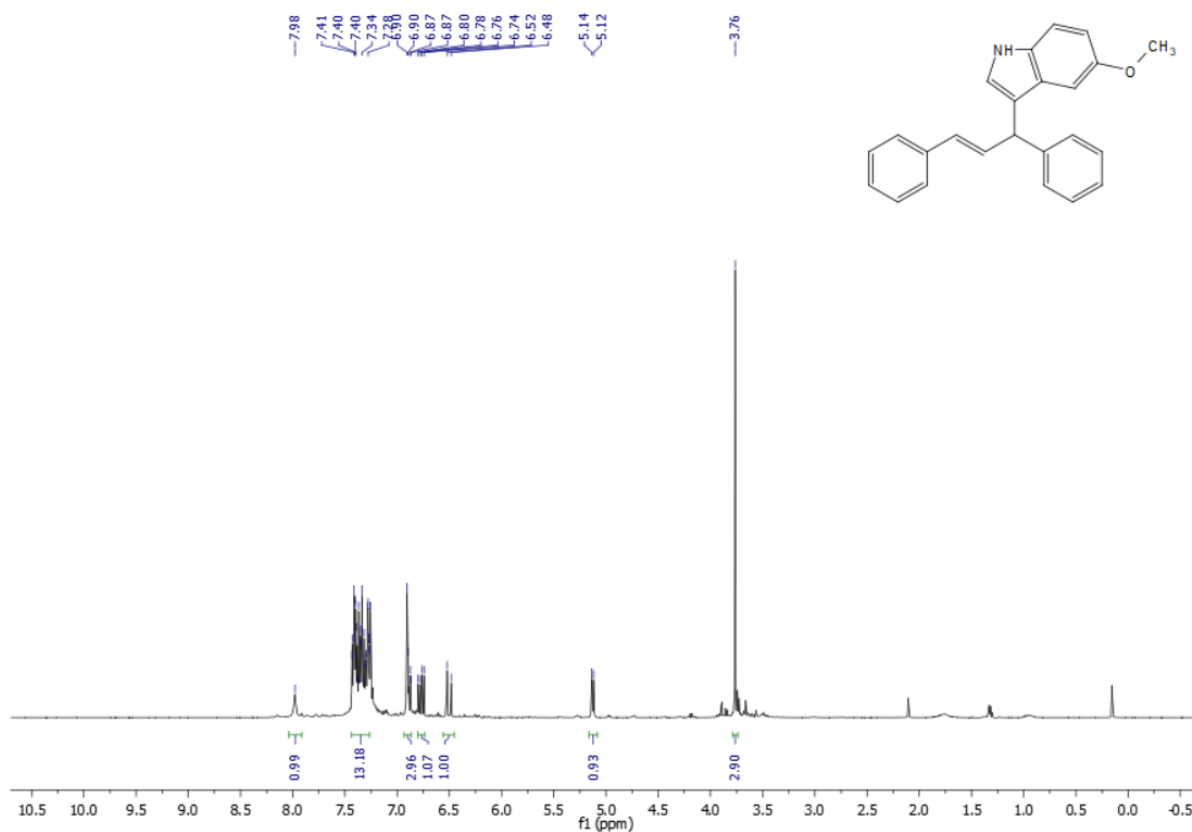

Figure S34. <sup>1</sup>H NMR spectrum of (E)-3-(1,3-diphenylallyl)-5-methoxy-1H-indole (7)

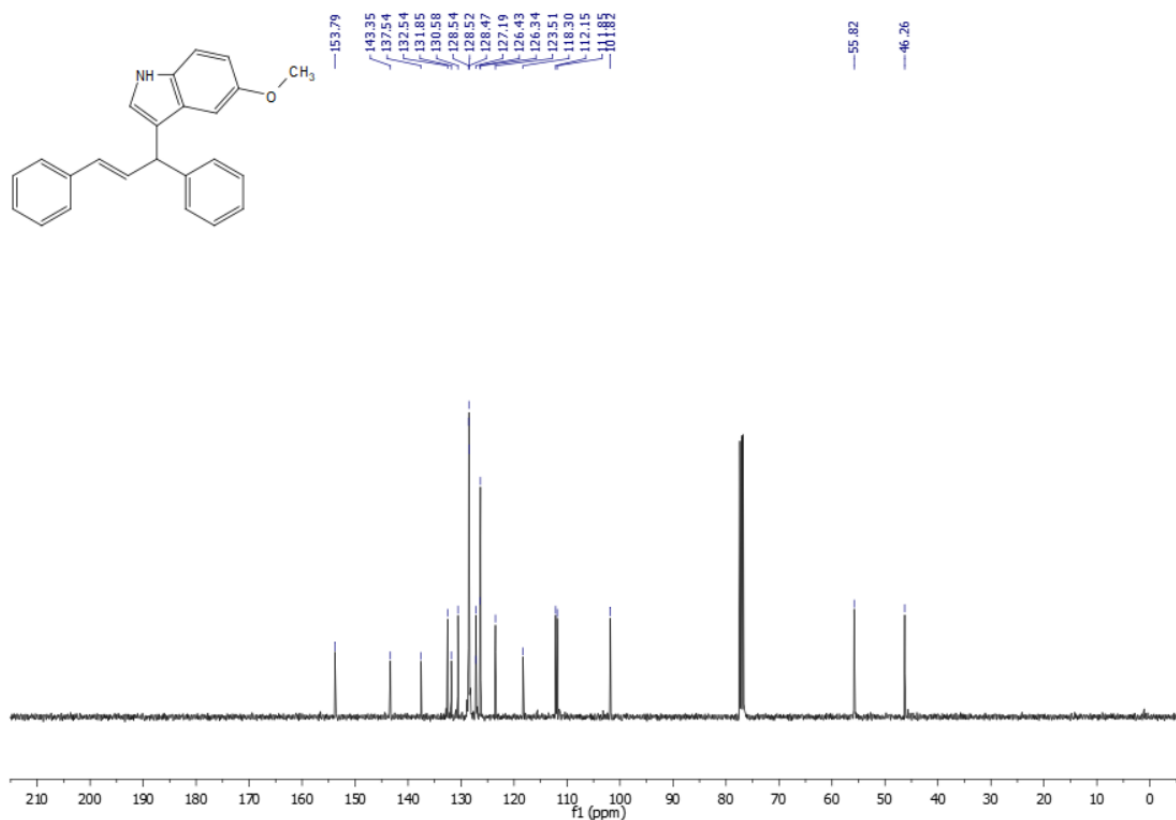

Figure S35. <sup>13</sup>C NMR spectrum of (E)-3-(1,3-diphenylallyl)-5-methoxy-1H-indole (7)

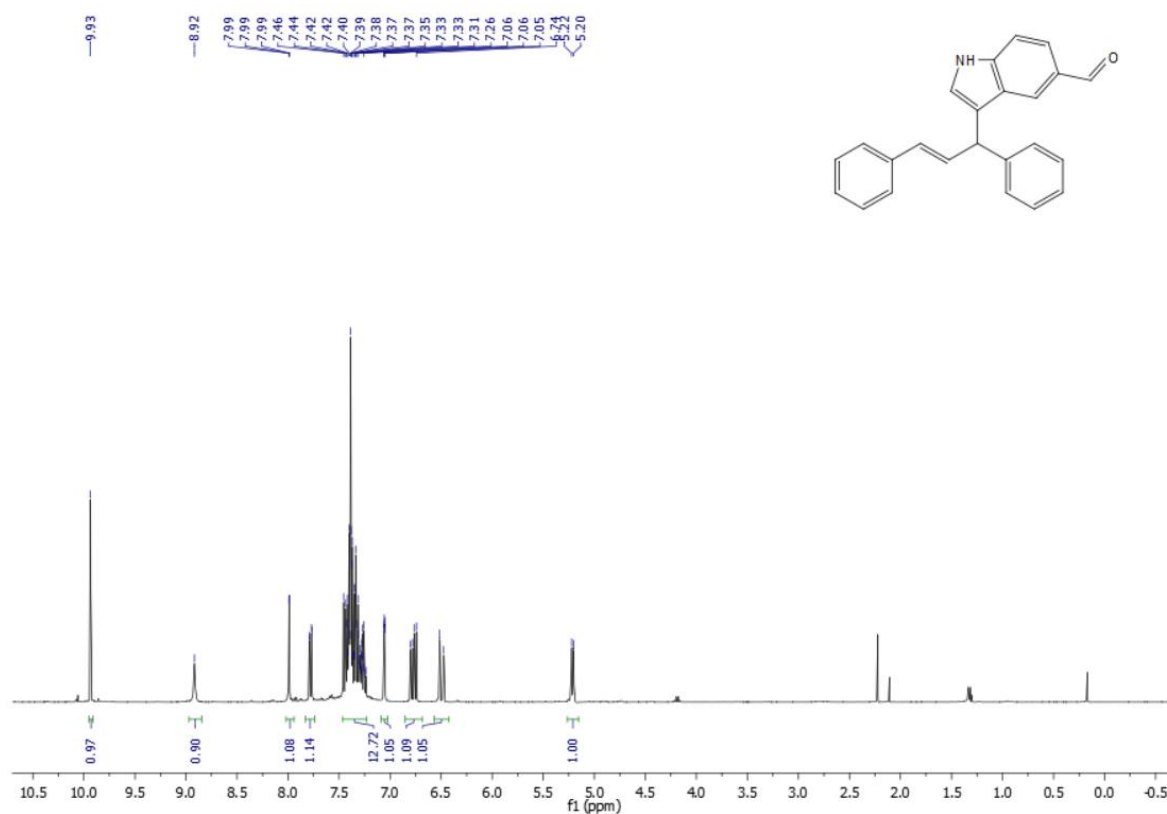

Figure S36. <sup>1</sup>H NMR spectrum of (E)-3-(1,3-diphenylallyl)-5-formyl-1H-indole (8)

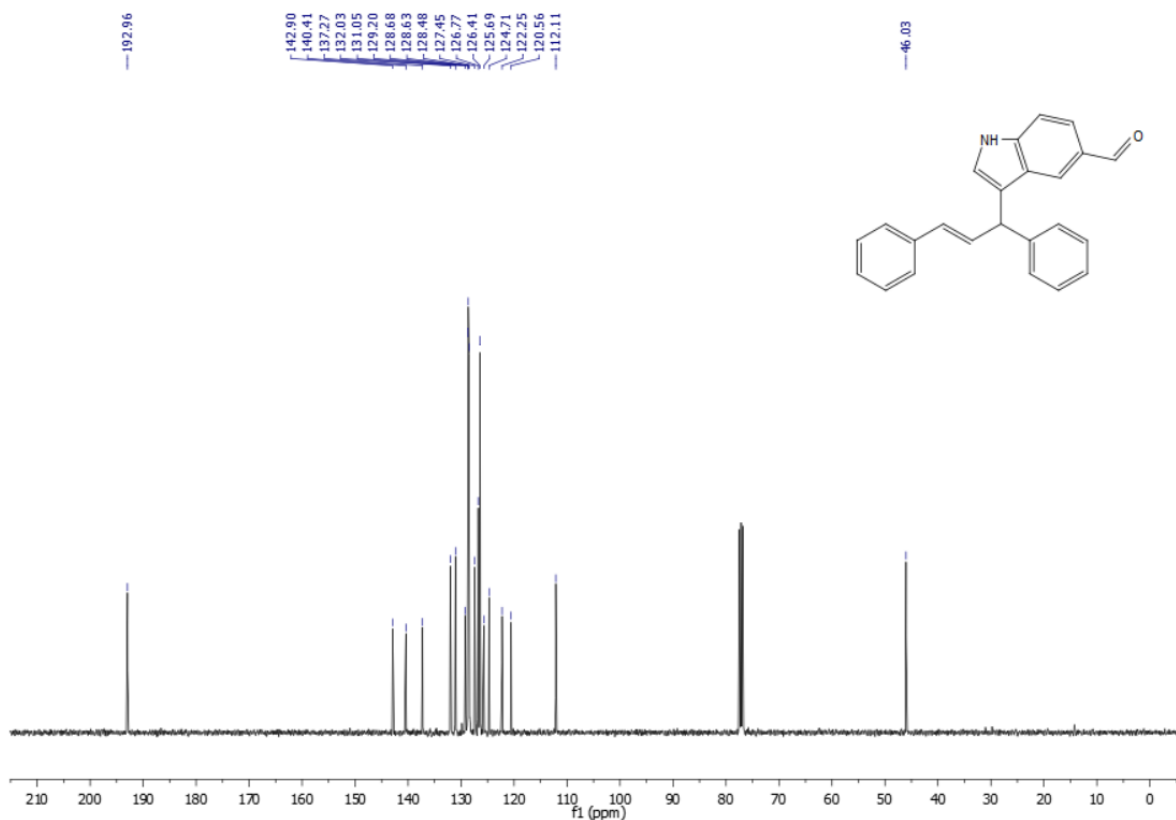

Figure S37. <sup>13</sup>C NMR spectrum of (E)-3-(1,3-diphenylallyl)-5-formyl-1H-indole (8)

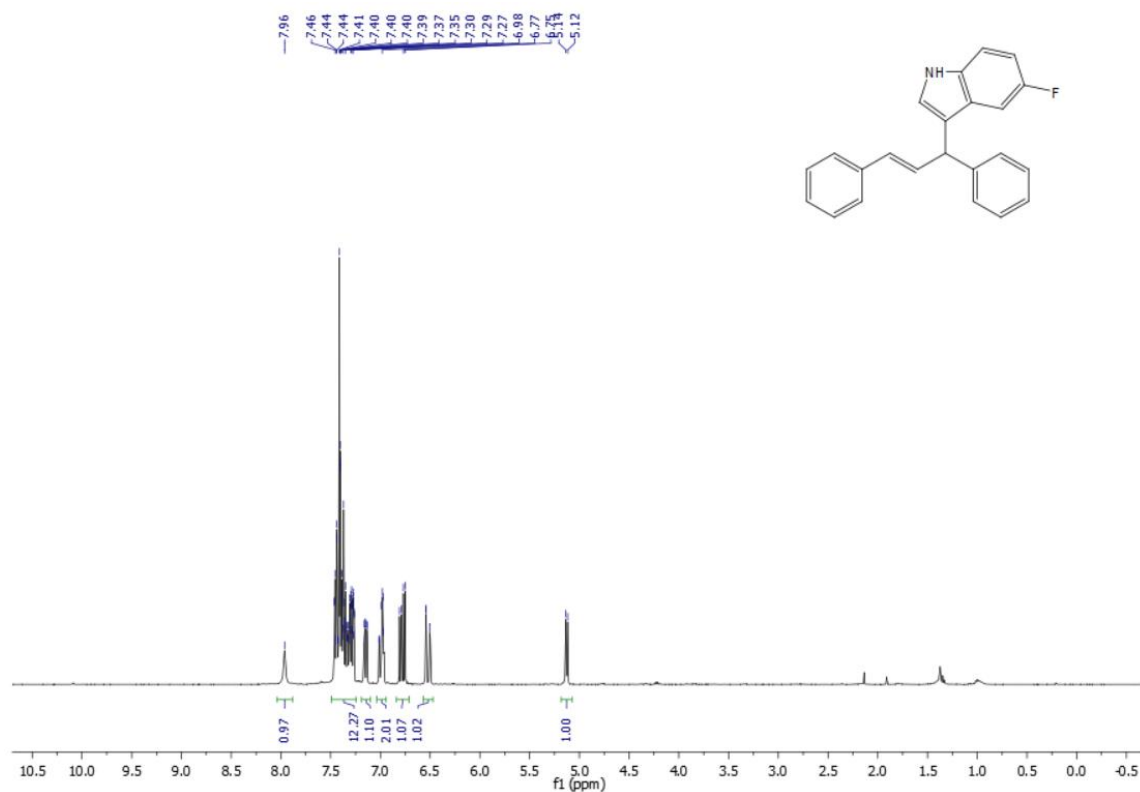

Figure S38. <sup>1</sup>H NMR spectrum of (E)-3-(1,3-diphenylallyl)-5-fluoro-1H-indole (9)

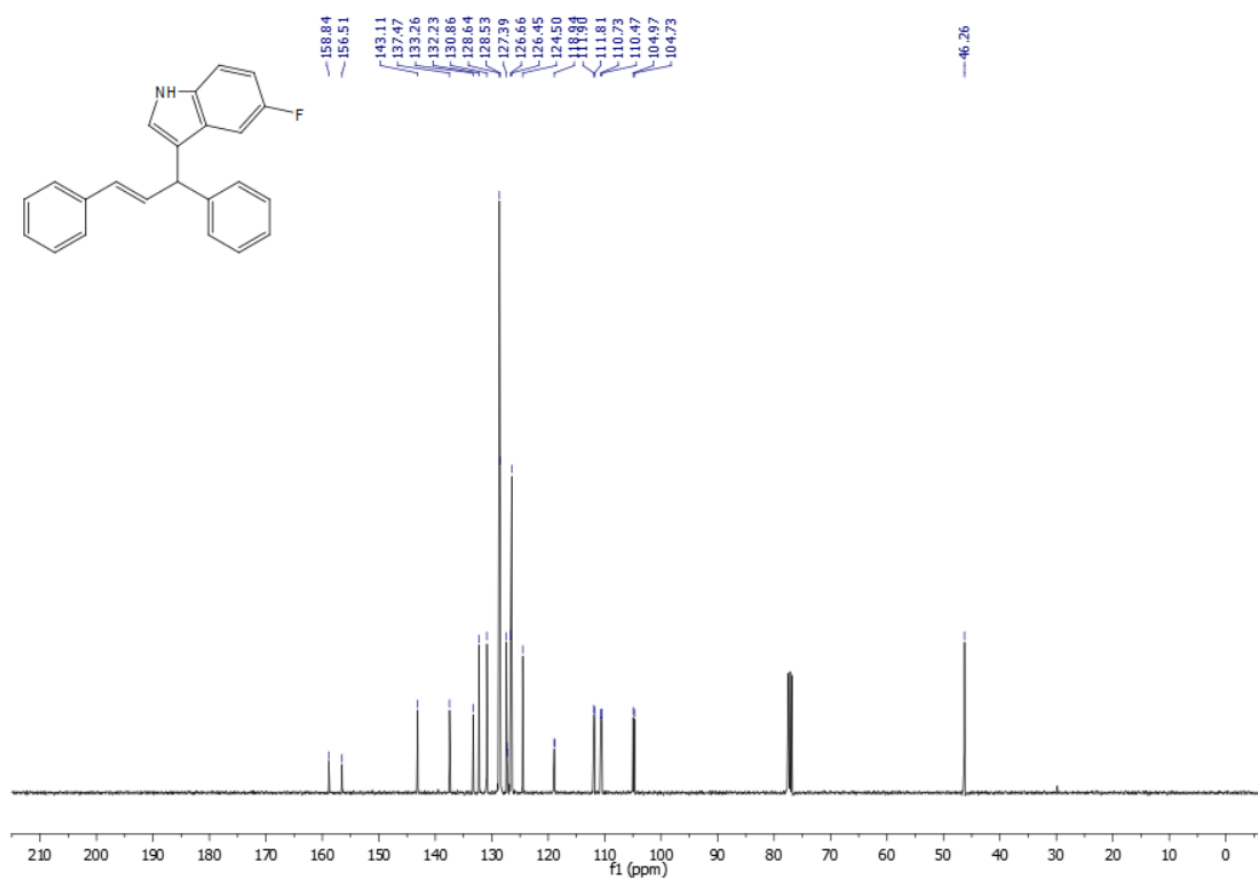

Figure S39. <sup>13</sup>C NMR spectrum of (E)-3-(1,3-diphenylallyl)-5-fluoro-1H-indole (9)

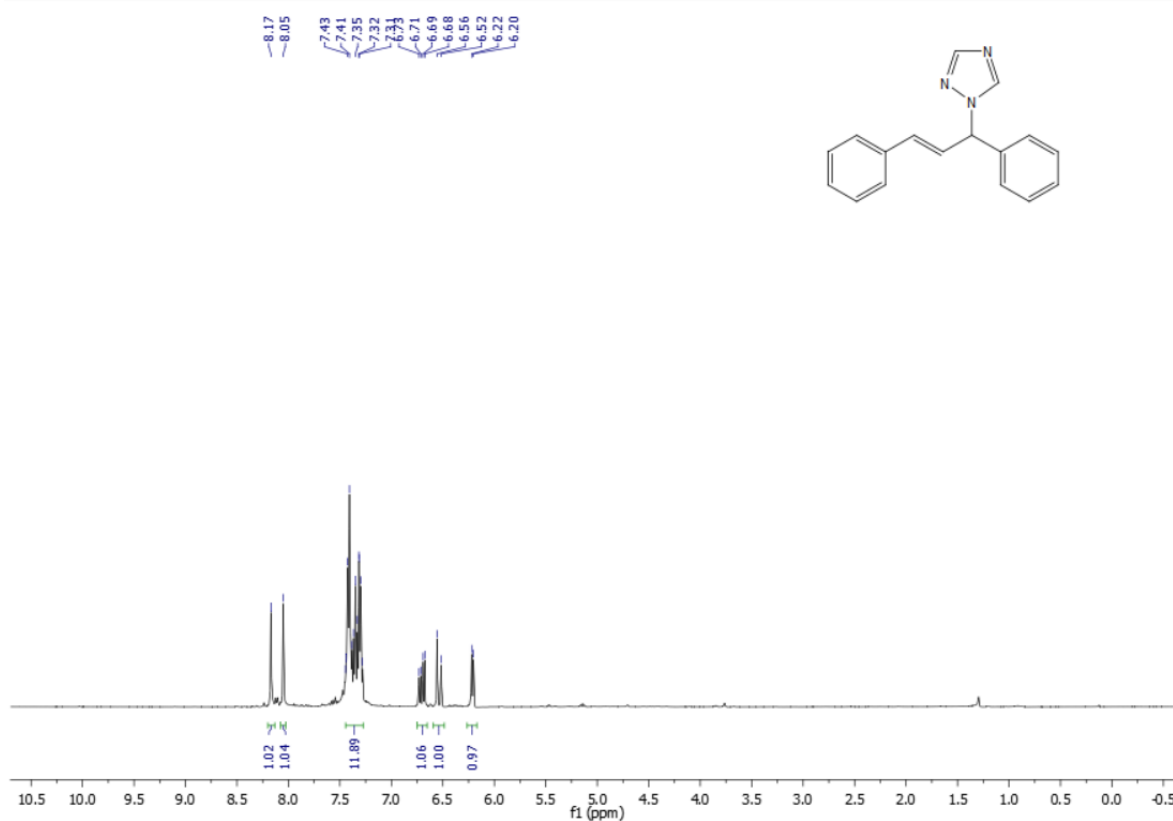

Figure S40. <sup>1</sup>H NMR spectrum of (E)-1-(1,3-diphenylallyl)-1,2,4-triazole (10)

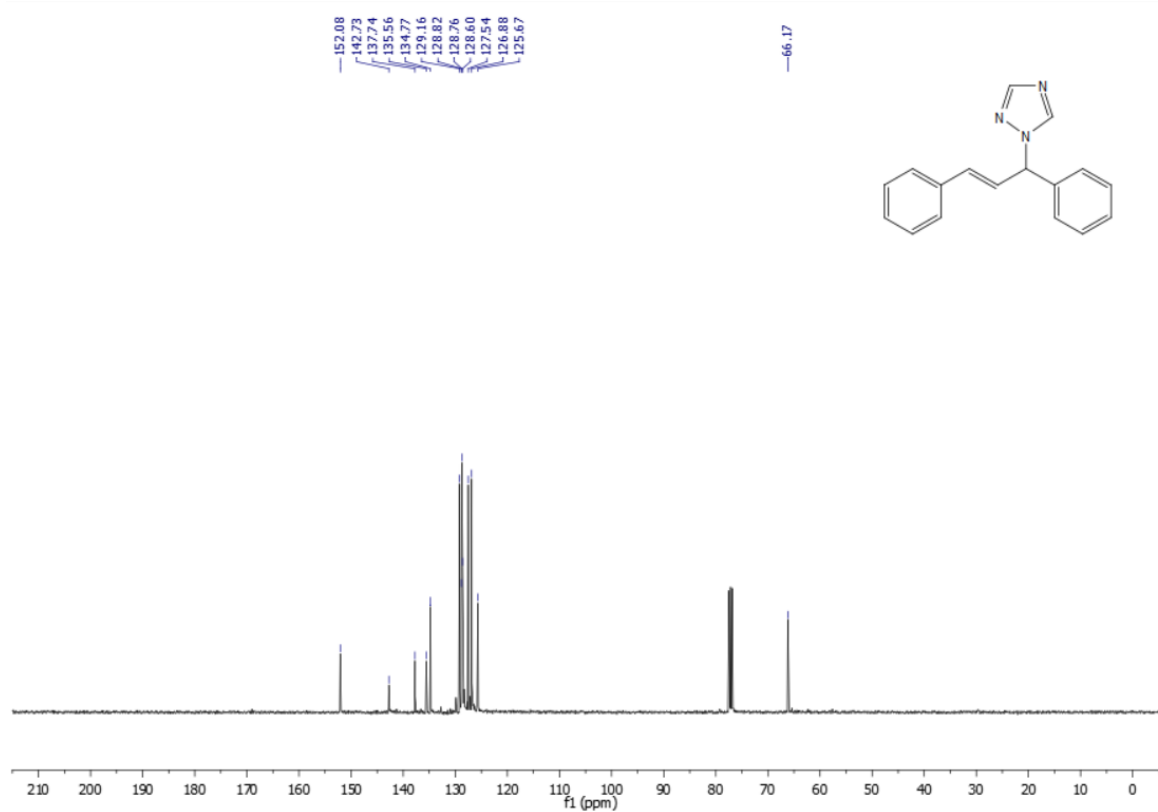

Figure S41. <sup>13</sup>C NMR spectrum of (E)-1-(1,3-diphenylallyl)-1,2,4-triazole (10)

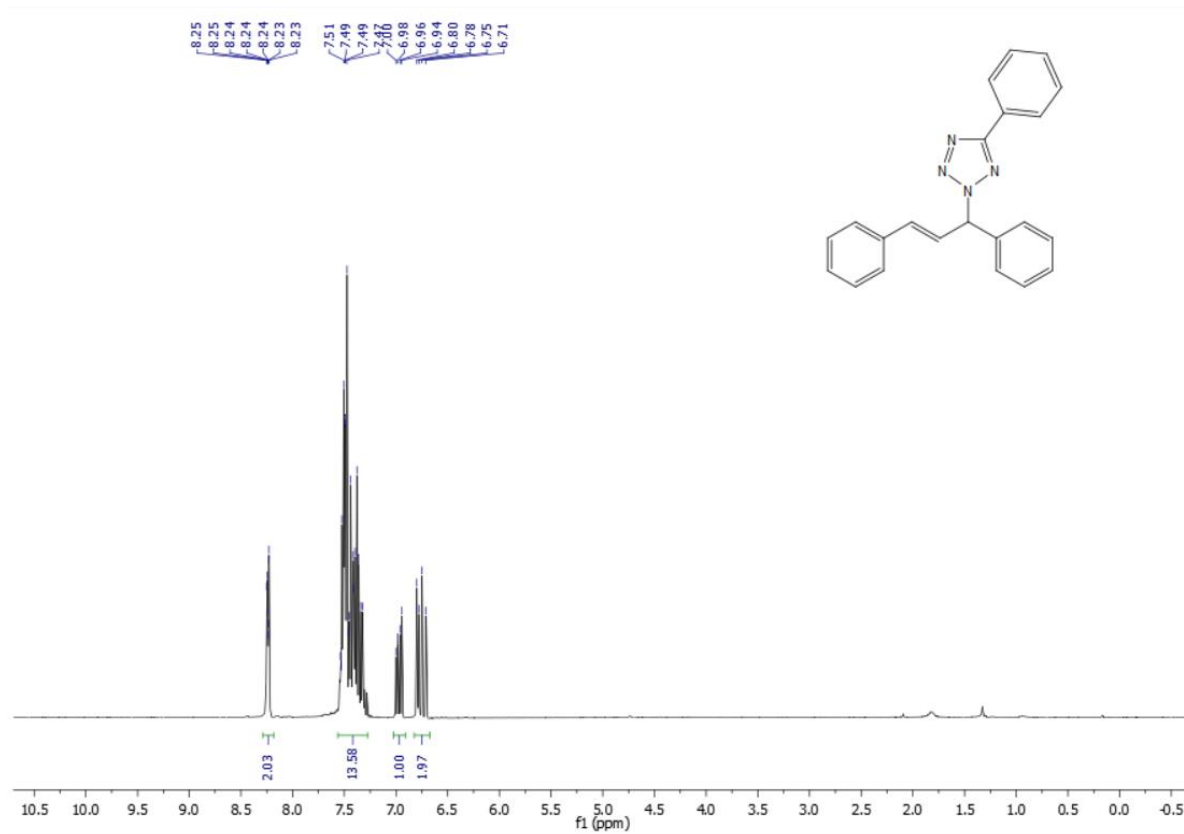

Figure S42. <sup>1</sup>H NMR spectrum of (E)-2-(1,3-diphenylallyl)-5-phenyl-2H-tetrazole (11)

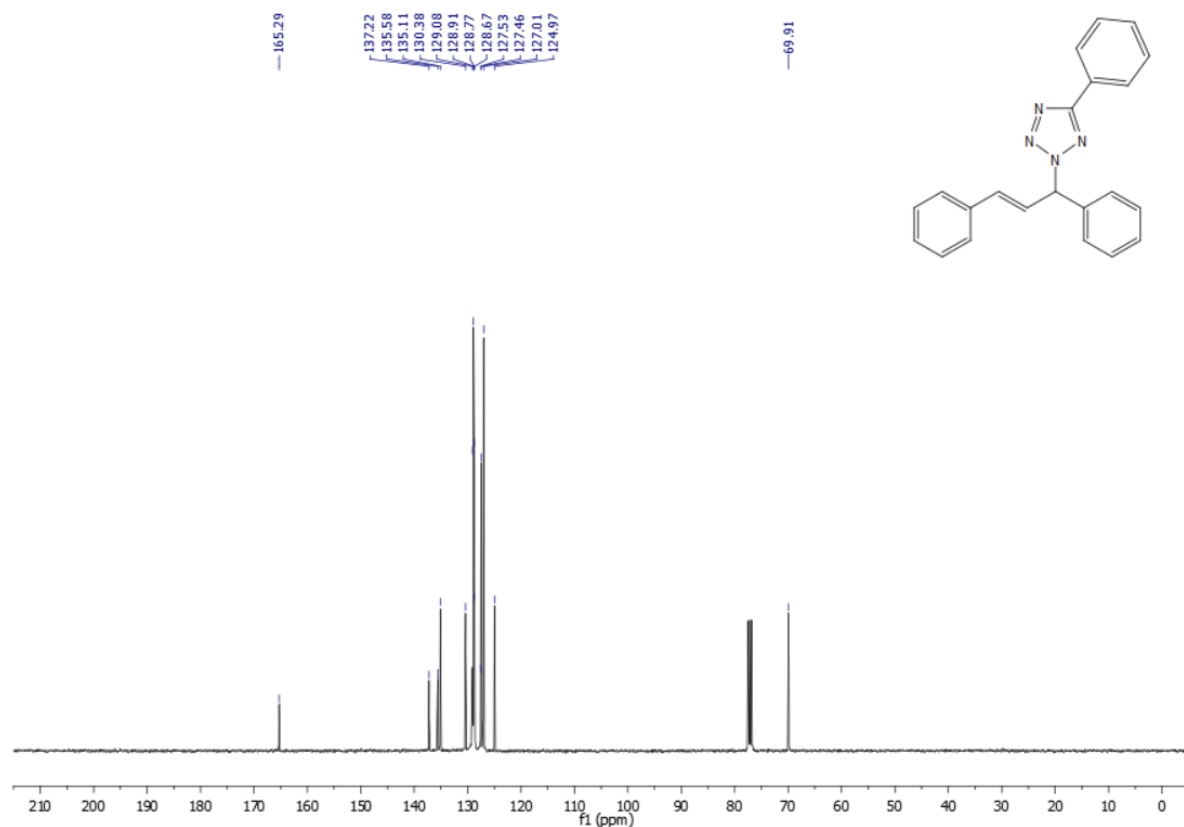

Figure S43. <sup>13</sup>C NMR spectrum of (E)-2-(1,3-diphenylallyl)-5-phenyl-2H-tetrazole (11)



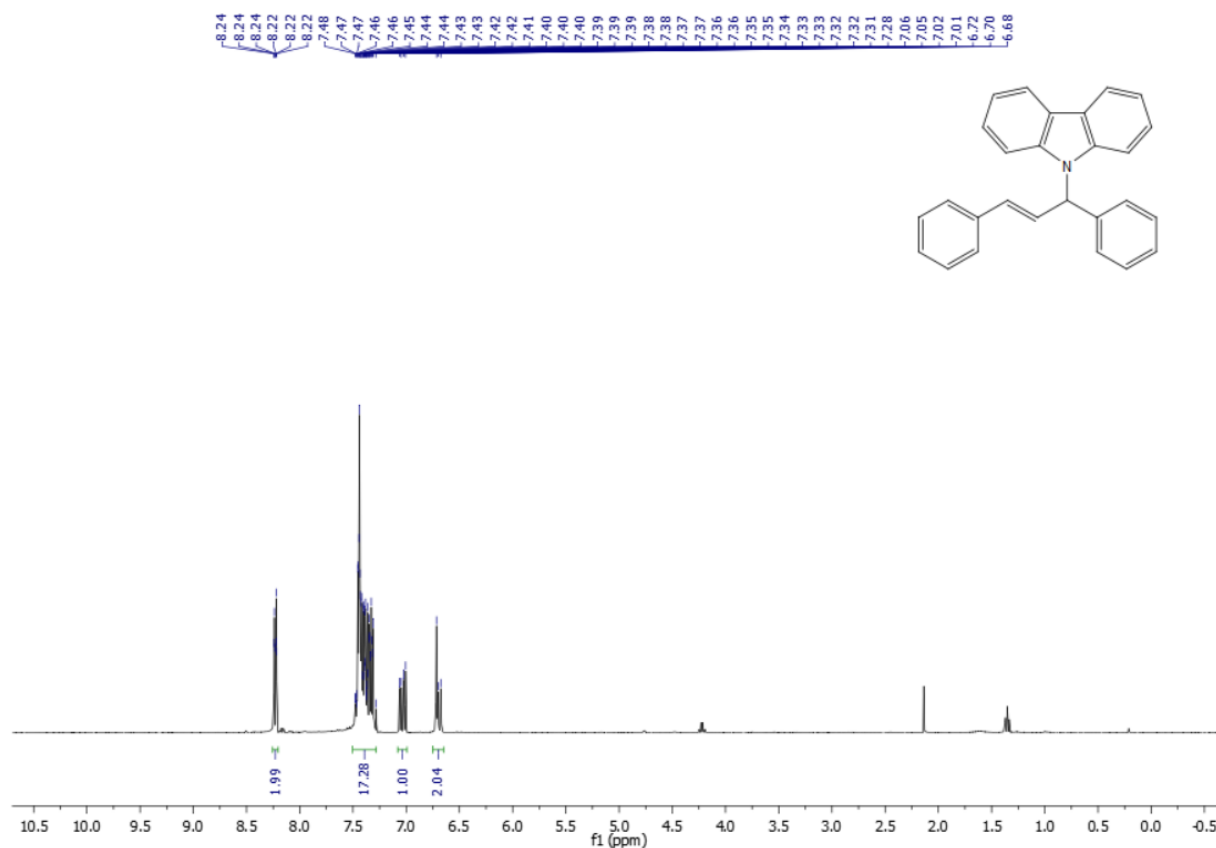

Figure S44. <sup>1</sup>H NMR spectrum of (E)-9-(1,3-diphenylallyl)-9H-carbazole (12)

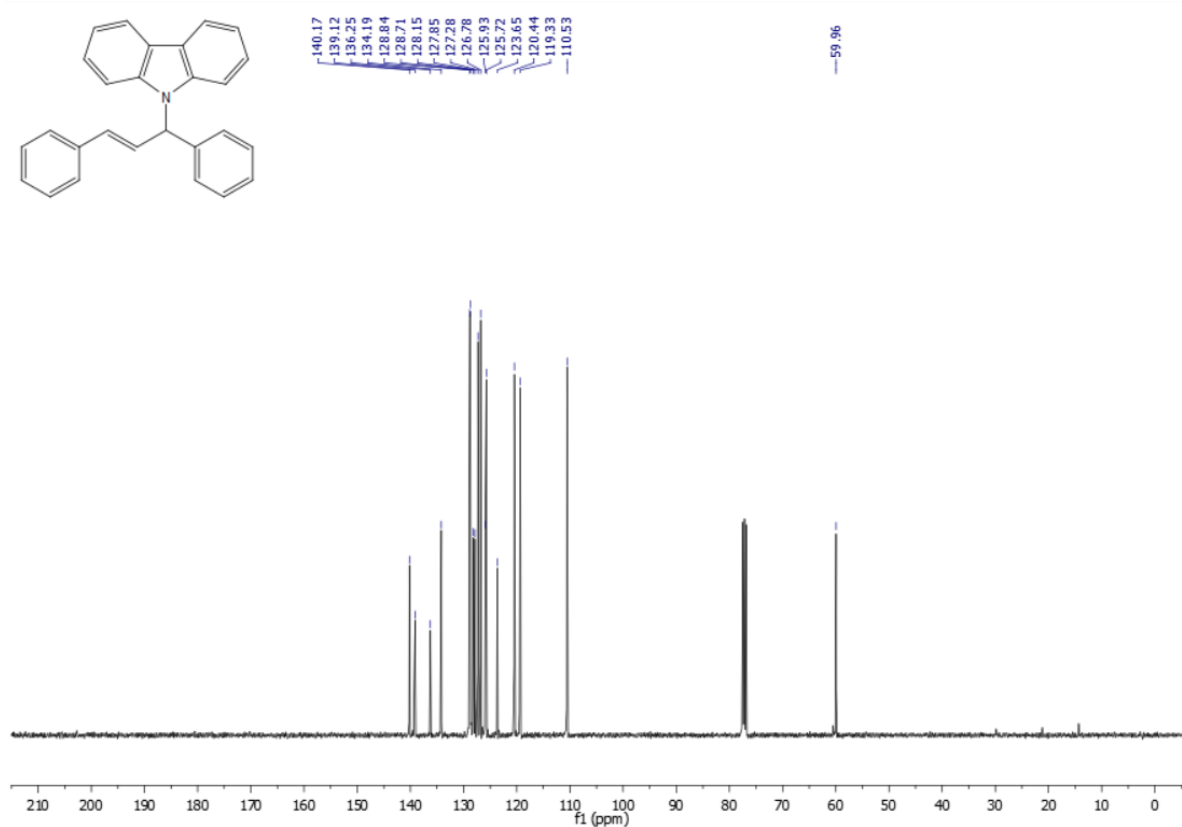

Figure S45. <sup>13</sup>C NMR spectrum of (E)-9-(1,3-diphenylallyl)-9H-carbazole (12)

Miscellaneous images

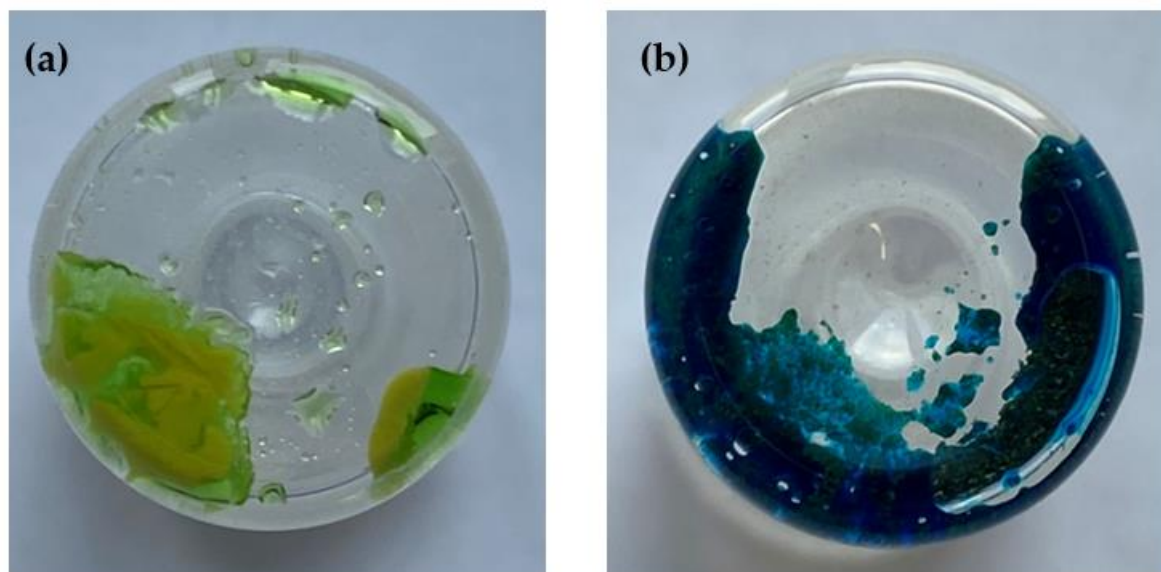

Figure S46. 1:1 mcmimCl:NiCl<sub>2</sub>·6H<sub>2</sub>O mixture (a) cooled down for 5 minutes after preparation (b) heated up again until development of condensation
